# Supplementary material for: Historical and future trends in wetting and drying in 291 catchments across China
Source: Copernicus journal article supplement (doi:10.5194/hess-21-2233-2017), 2017-04-26
Supplement: Supplementary file 1 [file hess-21-2233-2017-supplement.pdf]

Supplement of Hydrol. Earth Syst. Sci., 21, 2233–2248, 2017  
<http://www.hydrol-earth-syst-sci.net/21/2233/2017/>  
doi:10.5194/hess-21-2233-2017-supplement  
© Author(s) 2017. CC Attribution 3.0 License.

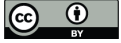

*Supplement of*

## **Historical and future trends in wetting and drying in 291 catchments across China**

**Zhongwang Chen et al.**

*Correspondence to:* Hanbo Yang ([yanghanbo@tsinghua.edu.cn](mailto:yanghanbo@tsinghua.edu.cn))

The copyright of individual parts of the supplement might differ from the CC-BY 3.0 licence.

**Table S1.** Basic characteristics of the 291 study catchments from 1956 to 2000 (including catchment number; catchment area; data length; mean annual value of runoff  $\bar{Q}$ , precipitation  $\bar{P}$ , potential evaporation  $\bar{E}_p$  and aridity index  $\varphi$ ; parameter  $n$  and runoff trend  $k_Q$ ).

| Catchment number           | Area (km <sup>2</sup> ) | Data length | $\bar{Q}$ (mm) | $\bar{P}$ (mm) | $\bar{E}_p$ (mm) | $\varphi$ | $n$  | $k_Q$ (mm a <sup>-1</sup> ) |
|----------------------------|-------------------------|-------------|----------------|----------------|------------------|-----------|------|-----------------------------|
| <i>Songhua River Basin</i> |                         |             |                |                |                  |           |      |                             |
| 1                          | 1884                    | 45          | 35             | 504            | 1124             | 2.31      | 2.20 | 0.49                        |
| 2                          | 2272                    | 45          | 181            | 575            | 1019             | 1.82      | 1.12 | -2.17                       |
| 3                          | 2313                    | 45          | 166            | 569            | 1112             | 2.02      | 1.12 | -0.51                       |
| 4                          | 2750                    | 45          | 288            | 592            | 1029             | 1.81      | 0.76 | -1.98                       |
| 5                          | 3099                    | 45          | 188            | 462            | 857              | 1.90      | 0.88 | 0.27                        |
| 6                          | 3420                    | 45          | 173            | 557            | 1007             | 1.88      | 1.12 | -1.45                       |
| 7                          | 3585                    | 45          | 362            | 592            | 1013             | 1.76      | 0.58 | -0.95                       |
| 8                          | 4171                    | 45          | 160            | 481            | 1068             | 2.29      | 0.95 | -0.02                       |
| 9                          | 4185                    | 45          | 110            | 556            | 1052             | 1.97      | 1.49 | -2.32                       |
| 10                         | 4340                    | 45          | 62             | 541            | 1025             | 2.00      | 2.01 | -2.66                       |
| 11                         | 4359                    | 45          | 134            | 558            | 967              | 1.79      | 1.39 | -0.89                       |
| 12                         | 4956                    | 45          | 191            | 576            | 1003             | 1.79      | 1.08 | -2.36                       |
| 13                         | 6469                    | 45          | 175            | 674            | 1006             | 1.53      | 1.47 | 0.57                        |
| 14                         | 7200                    | 45          | 153            | 536            | 1055             | 2.03      | 1.13 | -2.52                       |
| 15                         | 7711                    | 45          | 238            | 452            | 787              | 1.77      | 0.70 | 0.87                        |
| 16                         | 8224                    | 45          | 75             | 515            | 1072             | 2.16      | 1.66 | -1.60                       |
| 17                         | 1338                    | 45          | 185            | 563            | 916              | 1.68      | 1.14 | -0.95                       |
| 18                         | 4104                    | 45          | 94             | 454            | 1214             | 2.78      | 1.18 | -0.16                       |
| 19                         | 6508                    | 45          | 50             | 576            | 1151             | 2.05      | 2.20 | 0.04                        |
| 20                         | 7573                    | 45          | 96             | 638            | 1087             | 1.75      | 1.90 | -1.82                       |
| 21                         | 5414                    | 45          | 226            | 587            | 969              | 1.70      | 0.98 | -0.98                       |
| 22                         | 20556                   | 45          | 78             | 544            | 1032             | 1.99      | 1.79 | -2.14                       |
| 23                         | 10355                   | 45          | 35             | 407            | 1177             | 3.04      | 1.70 | 0.16                        |
| 24                         | 12391                   | 45          | 195            | 756            | 964              | 1.30      | 1.71 | -1.02                       |
| 25                         | 15536                   | 45          | 151            | 450            | 813              | 1.86      | 1.05 | -0.36                       |
| 26                         | 15544                   | 45          | 142            | 582            | 1146             | 2.02      | 1.27 | -0.23                       |
| 27                         | 15652                   | 45          | 195            | 556            | 1030             | 1.90      | 1.00 | -1.57                       |
| 28                         | 16218                   | 45          | 107            | 557            | 1013             | 1.89      | 1.56 | -2.01                       |
| 29                         | 17205                   | 45          | 173            | 500            | 937              | 1.92      | 1.01 | -0.88                       |
| 30                         | 18339                   | 45          | 165            | 605            | 1069             | 1.82      | 1.25 | -2.25                       |
| 31                         | 19665                   | 45          | 199            | 491            | 882              | 1.83      | 0.89 | 1.06                        |
| 32                         | 25292                   | 45          | 189            | 481            | 945              | 2.01      | 0.88 | 0.62                        |
| 33                         | 27736                   | 45          | 125            | 554            | 1077             | 2.01      | 1.34 | -1.55                       |
| 34                         | 31082                   | 45          | 214            | 479            | 911              | 1.94      | 0.79 | -0.96                       |
| 35                         | 35879                   | 45          | 218            | 603            | 984              | 1.68      | 1.05 | -1.25                       |
| 36                         | 43164                   | 45          | 82             | 409            | 942              | 2.36      | 1.30 | 0.31                        |
| <i>Liao River Basin</i>    |                         |             |                |                |                  |           |      |                             |
| 37                         | 1000                    | 45          | 172            | 744            | 1102             | 1.54      | 1.62 | -2.88                       |
| 38                         | 5629                    | 45          | 539            | 895            | 1010             | 1.17      | 0.71 | -3.13                       |

|    |       |    |     |     |      |      |      |       |
|----|-------|----|-----|-----|------|------|------|-------|
| 39 | 1071  | 43 | 192 | 667 | 1210 | 1.91 | 1.18 | -2.89 |
| 40 | 1166  | 43 | 592 | 920 | 958  | 1.08 | 0.66 | -5.57 |
| 41 | 1170  | 42 | 253 | 715 | 1088 | 1.58 | 1.11 | -5.90 |
| 42 | 1774  | 45 | 131 | 698 | 1030 | 1.51 | 1.89 | -0.92 |
| 43 | 2138  | 45 | 37  | 515 | 1313 | 2.67 | 1.98 | -0.68 |
| 44 | 3008  | 45 | 185 | 589 | 1187 | 2.13 | 1.04 | -1.05 |
| 45 | 3172  | 45 | 110 | 540 | 1257 | 2.45 | 1.28 | 0.03  |
| 46 | 4731  | 45 | 445 | 821 | 928  | 1.16 | 0.82 | -2.17 |
| 47 | 4810  | 44 | 434 | 811 | 1071 | 1.37 | 0.77 | -1.72 |
| 48 | 5647  | 43 | 46  | 484 | 1326 | 2.86 | 1.68 | -0.87 |
| 49 | 1396  | 45 | 27  | 399 | 1258 | 3.34 | 1.77 | 0.47  |
| 50 | 2083  | 45 | 50  | 446 | 1284 | 3.02 | 1.52 | -1.18 |
| 51 | 8217  | 45 | 34  | 366 | 1207 | 3.45 | 1.53 | 0.17  |
| 52 | 8678  | 45 | 35  | 426 | 1130 | 2.75 | 1.82 | -0.80 |
| 53 | 10418 | 45 | 60  | 672 | 1070 | 1.63 | 2.68 | -0.64 |
| 54 | 14813 | 45 | 438 | 859 | 960  | 1.15 | 0.90 | -1.79 |

*Haihe River Basin*

|    |      |    |     |     |      |      |      |       |
|----|------|----|-----|-----|------|------|------|-------|
| 55 | 785  | 45 | 31  | 398 | 1234 | 3.29 | 1.68 | -0.27 |
| 56 | 5060 | 42 | 78  | 535 | 1069 | 2.11 | 1.70 | -2.27 |
| 57 | 1086 | 45 | 66  | 402 | 1107 | 2.84 | 1.31 | -0.63 |
| 58 | 1600 | 45 | 76  | 457 | 1289 | 2.92 | 1.29 | -1.07 |
| 59 | 1615 | 38 | 77  | 564 | 1078 | 1.99 | 1.82 | -1.12 |
| 60 | 1617 | 45 | 31  | 386 | 1136 | 3.04 | 1.72 | -0.18 |
| 61 | 1661 | 45 | 117 | 585 | 1065 | 1.91 | 1.51 | -0.81 |
| 62 | 1760 | 45 | 140 | 501 | 1302 | 2.77 | 1.00 | -4.11 |
| 63 | 2019 | 45 | 26  | 379 | 1320 | 3.63 | 1.66 | -0.24 |
| 64 | 2300 | 45 | 36  | 548 | 1164 | 2.26 | 2.34 | -1.91 |
| 65 | 2360 | 45 | 34  | 410 | 1286 | 3.25 | 1.64 | -0.74 |
| 66 | 2460 | 45 | 88  | 517 | 1098 | 2.21 | 1.49 | -1.71 |
| 67 | 2478 | 45 | 131 | 519 | 1347 | 2.75 | 1.06 | -1.00 |
| 68 | 2521 | 45 | 159 | 546 | 1224 | 2.40 | 1.04 | -3.61 |
| 69 | 4040 | 45 | 44  | 438 | 1283 | 3.04 | 1.58 | -1.27 |
| 70 | 4266 | 45 | 61  | 486 | 1212 | 2.58 | 1.58 | -1.44 |
| 71 | 5060 | 45 | 144 | 608 | 1094 | 1.89 | 1.37 | -1.64 |
| 72 | 1227 | 42 | 39  | 425 | 1142 | 2.77 | 1.74 | -0.42 |
| 73 | 1378 | 42 | 66  | 488 | 1178 | 2.50 | 1.55 | -1.44 |
| 74 | 2890 | 45 | 31  | 417 | 1303 | 3.26 | 1.72 | -0.91 |
| 75 | 4061 | 43 | 70  | 535 | 1384 | 2.75 | 1.52 | -2.19 |
| 76 | 4990 | 42 | 55  | 507 | 1323 | 2.78 | 1.64 | -1.14 |
| 77 | 4810 | 45 | 105 | 472 | 1298 | 2.93 | 1.12 | -4.30 |
| 78 | 2950 | 43 | 108 | 600 | 1197 | 2.10 | 1.52 | -1.51 |
| 79 | 1611 | 45 | 63  | 501 | 1297 | 2.75 | 1.55 | -2.18 |
| 80 | 2404 | 41 | 48  | 458 | 1124 | 2.54 | 1.73 | -0.95 |
| 81 | 2822 | 28 | 127 | 603 | 1055 | 1.83 | 1.51 | 1.27  |
| 82 | 5387 | 43 | 64  | 552 | 1206 | 2.33 | 1.79 | -2.52 |
| 83 | 6420 | 43 | 83  | 549 | 1229 | 2.39 | 1.54 | -2.82 |
| 84 | 6761 | 45 | 51  | 463 | 1132 | 2.53 | 1.69 | -1.13 |
| 85 | 1927 | 43 | 61  | 455 | 1231 | 2.80 | 1.46 | -1.46 |

|    |       |    |    |     |      |      |      |       |
|----|-------|----|----|-----|------|------|------|-------|
| 86 | 2950  | 44 | 81 | 503 | 1320 | 2.78 | 1.36 | -2.20 |
| 87 | 11250 | 45 | 47 | 546 | 1058 | 2.03 | 2.25 | -2.14 |
| 88 | 11936 | 45 | 46 | 534 | 1312 | 2.61 | 1.89 | -1.14 |
| 89 | 17100 | 45 | 35 | 410 | 1242 | 3.12 | 1.66 | -0.70 |
| 90 | 25533 | 45 | 17 | 431 | 1269 | 3.09 | 2.21 | -0.83 |

*Yellow River Basin*

|     |       |    |     |     |      |      |      |       |
|-----|-------|----|-----|-----|------|------|------|-------|
| 91  | 763   | 45 | 234 | 765 | 1270 | 1.76 | 1.19 | -2.98 |
| 92  | 1476  | 44 | 53  | 465 | 1156 | 2.63 | 1.66 | -1.53 |
| 93  | 2282  | 45 | 14  | 299 | 1372 | 4.94 | 1.63 | -0.26 |
| 94  | 2476  | 41 | 219 | 685 | 1160 | 1.76 | 1.14 | -3.73 |
| 95  | 2914  | 45 | 32  | 357 | 1285 | 3.81 | 1.49 | -0.52 |
| 96  | 4102  | 45 | 58  | 478 | 1135 | 2.51 | 1.66 | -1.07 |
| 97  | 6843  | 45 | 131 | 493 | 950  | 1.98 | 1.21 | -1.74 |
| 98  | 8645  | 45 | 66  | 399 | 1272 | 3.42 | 1.21 | -1.36 |
| 99  | 9245  | 45 | 103 | 556 | 1100 | 2.06 | 1.50 | -3.64 |
| 100 | 9805  | 45 | 34  | 459 | 1117 | 2.53 | 2.02 | -0.82 |
| 101 | 4715  | 45 | 21  | 538 | 1075 | 2.08 | 2.99 | -0.08 |
| 102 | 5043  | 20 | 191 | 570 | 965  | 1.72 | 1.10 | -7.20 |
| 103 | 990   | 44 | 15  | 424 | 1141 | 2.81 | 2.44 | -0.42 |
| 104 | 1121  | 39 | 21  | 544 | 1101 | 2.12 | 2.97 | -0.29 |
| 105 | 1121  | 40 | 64  | 438 | 1214 | 2.97 | 1.39 | -1.58 |
| 106 | 1263  | 40 | 64  | 408 | 1243 | 3.34 | 1.27 | -1.36 |
| 107 | 2169  | 39 | 36  | 560 | 1140 | 2.13 | 2.44 | -0.82 |
| 108 | 2266  | 33 | 46  | 573 | 1102 | 1.98 | 2.35 | -0.58 |
| 109 | 2484  | 38 | 22  | 468 | 1078 | 2.39 | 2.48 | -0.56 |
| 110 | 3083  | 33 | 89  | 365 | 1107 | 3.10 | 1.01 | -0.18 |
| 111 | 3149  | 42 | 77  | 594 | 1082 | 1.92 | 1.96 | -2.55 |
| 112 | 3208  | 33 | 41  | 448 | 1102 | 2.56 | 1.83 | 0.05  |
| 113 | 3468  | 45 | 41  | 482 | 1115 | 2.43 | 1.96 | -0.21 |
| 114 | 4853  | 42 | 13  | 398 | 1155 | 3.04 | 2.38 | -0.19 |
| 115 | 3992  | 40 | 37  | 499 | 1104 | 2.34 | 2.15 | -1.12 |
| 116 | 4640  | 43 | 15  | 368 | 1228 | 3.48 | 2.03 | -0.02 |
| 117 | 3829  | 39 | 56  | 374 | 1318 | 3.87 | 1.21 | -0.95 |
| 118 | 913   | 40 | 43  | 469 | 1093 | 2.46 | 1.89 | -0.26 |
| 119 | 2831  | 45 | 49  | 402 | 1243 | 3.34 | 1.42 | -1.19 |
| 120 | 4959  | 45 | 121 | 442 | 1032 | 2.40 | 1.07 | -1.34 |
| 121 | 5891  | 45 | 36  | 485 | 1083 | 2.34 | 2.14 | -0.24 |
| 122 | 715   | 38 | 61  | 362 | 1118 | 3.14 | 1.22 | 0.08  |
| 123 | 8264  | 45 | 125 | 719 | 1360 | 2.00 | 1.60 | -4.24 |
| 124 | 554   | 45 | 136 | 732 | 1366 | 1.98 | 1.56 | -2.33 |
| 125 | 5318  | 45 | 158 | 691 | 1131 | 1.70 | 1.50 | -4.75 |
| 126 | 10647 | 45 | 11  | 395 | 1136 | 2.99 | 2.50 | -0.16 |
| 127 | 11891 | 45 | 142 | 676 | 1143 | 1.75 | 1.55 | -2.89 |
| 128 | 12880 | 45 | 63  | 568 | 1100 | 2.02 | 2.01 | -2.01 |
| 129 | 14124 | 45 | 51  | 497 | 1101 | 2.31 | 1.88 | -0.86 |
| 130 | 14480 | 45 | 8   | 348 | 1250 | 3.79 | 2.28 | -0.02 |
| 131 | 14912 | 45 | 223 | 570 | 936  | 1.68 | 0.97 | -2.68 |
| 132 | 15126 | 45 | 189 | 337 | 1105 | 3.33 | 0.52 | -0.29 |

|     |       |    |     |     |      |      |      |       |
|-----|-------|----|-----|-----|------|------|------|-------|
| 133 | 15342 | 45 | 105 | 365 | 1098 | 3.08 | 0.92 | -0.91 |
| 134 | 17180 | 45 | 27  | 505 | 1090 | 2.25 | 2.48 | -0.13 |
| 135 | 30661 | 45 | 69  | 500 | 1064 | 2.20 | 1.68 | -1.36 |
| 136 | 38728 | 45 | 26  | 505 | 1131 | 2.34 | 2.46 | -0.95 |
| 137 | 10603 | 45 | 11  | 419 | 1175 | 2.95 | 2.55 | -0.15 |
| 138 | 15325 | 45 | 106 | 355 | 1313 | 4.00 | 0.83 | -0.65 |
| 139 | 20930 | 45 | 31  | 335 | 1150 | 3.49 | 1.50 | -0.16 |

*Yangtze River Basin*

|     |        |    |      |      |      |      |      |       |
|-----|--------|----|------|------|------|------|------|-------|
| 140 | 443    | 45 | 721  | 1494 | 1178 | 0.82 | 1.31 | 6.84  |
| 141 | 1077   | 45 | 1039 | 1694 | 1174 | 0.72 | 0.92 | 8.66  |
| 142 | 1449   | 45 | 307  | 558  | 955  | 1.75 | 0.66 | -5.23 |
| 143 | 1697   | 45 | 706  | 1371 | 1088 | 0.82 | 1.15 | 1.99  |
| 144 | 2071   | 45 | 211  | 632  | 1047 | 1.72 | 1.11 | -2.53 |
| 145 | 2143   | 45 | 473  | 774  | 948  | 1.28 | 0.67 | -6.38 |
| 146 | 2200   | 45 | 534  | 1170 | 879  | 0.76 | 1.54 | 1.14  |
| 147 | 2603   | 45 | 552  | 1172 | 886  | 0.77 | 1.43 | 2.43  |
| 148 | 2750   | 45 | 213  | 686  | 949  | 1.44 | 1.34 | -3.72 |
| 149 | 2766   | 45 | 202  | 721  | 1108 | 1.59 | 1.36 | -2.45 |
| 150 | 3141   | 45 | 518  | 1013 | 829  | 0.82 | 1.13 | 0.04  |
| 151 | 3184   | 45 | 97   | 561  | 1031 | 1.90 | 1.65 | -1.74 |
| 152 | 3815   | 45 | 827  | 1526 | 997  | 0.67 | 1.28 | 5.44  |
| 153 | 5454   | 45 | 622  | 1158 | 833  | 0.73 | 1.17 | 1.03  |
| 154 | 5560   | 45 | 146  | 892  | 1341 | 1.54 | 2.03 | 0.32  |
| 155 | 5579   | 45 | 1069 | 1563 | 1026 | 0.67 | 0.75 | 1.53  |
| 156 | 6215   | 45 | 874  | 1578 | 1028 | 0.67 | 1.23 | 3.87  |
| 157 | 6374   | 45 | 1104 | 1797 | 1174 | 0.67 | 0.96 | 5.81  |
| 158 | 6448   | 45 | 306  | 768  | 1008 | 1.36 | 1.09 | -2.20 |
| 159 | 7591   | 45 | 221  | 872  | 1111 | 1.33 | 1.73 | -0.33 |
| 160 | 7657   | 45 | 810  | 1511 | 1048 | 0.72 | 1.23 | 0.84  |
| 161 | 7751   | 45 | 799  | 1598 | 1091 | 0.71 | 1.45 | 2.32  |
| 162 | 8205   | 45 | 298  | 627  | 934  | 1.51 | 0.84 | -1.22 |
| 163 | 9410   | 45 | 451  | 902  | 1013 | 1.13 | 0.92 | -2.34 |
| 164 | 9914   | 45 | 886  | 1565 | 1033 | 0.68 | 1.15 | 9.44  |
| 165 | 12696  | 45 | 372  | 943  | 1181 | 1.28 | 1.14 | -1.00 |
| 166 | 30661  | 45 | 429  | 908  | 942  | 1.05 | 1.05 | -2.05 |
| 167 | 38071  | 45 | 571  | 1093 | 878  | 0.83 | 1.11 | -0.85 |
| 168 | 108083 | 45 | 402  | 688  | 1141 | 1.67 | 0.62 | 0.59  |
| 169 | 372    | 45 | 930  | 1228 | 1118 | 0.95 | 0.51 | -0.03 |
| 170 | 841    | 45 | 750  | 1714 | 1225 | 0.74 | 1.81 | 9.24  |
| 171 | 1603   | 45 | 1079 | 1394 | 735  | 0.54 | 0.61 | 0.29  |
| 172 | 1657   | 45 | 1104 | 1348 | 858  | 0.65 | 0.47 | 0.50  |
| 173 | 2268   | 45 | 634  | 1267 | 798  | 0.64 | 1.66 | 1.89  |
| 174 | 2452   | 45 | 920  | 1326 | 735  | 0.57 | 0.81 | 0.09  |
| 175 | 2689   | 45 | 851  | 1547 | 1052 | 0.70 | 1.19 | 2.10  |
| 176 | 3346   | 45 | 843  | 1247 | 786  | 0.64 | 0.79 | 0.44  |
| 177 | 5013   | 45 | 927  | 1777 | 1191 | 0.69 | 1.36 | 9.57  |
| 178 | 5055   | 45 | 543  | 1179 | 862  | 0.74 | 1.57 | 1.22  |
| 179 | 5566   | 45 | 556  | 1140 | 860  | 0.76 | 1.34 | 1.48  |

|     |       |    |     |      |      |      |      |       |
|-----|-------|----|-----|------|------|------|------|-------|
| 180 | 6039  | 45 | 612 | 1194 | 904  | 0.77 | 1.22 | 2.32  |
| 181 | 9456  | 45 | 470 | 1010 | 903  | 0.90 | 1.22 | -0.75 |
| 182 | 9538  | 45 | 144 | 595  | 1015 | 1.76 | 1.40 | -2.22 |
| 183 | 10958 | 45 | 184 | 806  | 1069 | 1.38 | 1.81 | -1.24 |
| 184 | 14288 | 45 | 289 | 621  | 944  | 1.55 | 0.85 | -1.85 |
| 185 | 16622 | 45 | 478 | 1065 | 826  | 0.78 | 1.52 | 1.11  |
| 186 | 23283 | 45 | 353 | 1050 | 837  | 0.80 | 2.46 | -2.91 |
| 187 | 23805 | 45 | 440 | 836  | 954  | 1.19 | 0.85 | -2.79 |
| 188 | 52150 | 45 | 811 | 1499 | 1028 | 0.70 | 1.22 | 1.88  |
| 189 | 639   | 45 | 601 | 1131 | 852  | 0.76 | 1.15 | 1.43  |
| 190 | 1111  | 45 | 773 | 1223 | 1119 | 0.96 | 0.73 | 0.74  |
| 191 | 1136  | 45 | 848 | 1615 | 1122 | 0.72 | 1.28 | 4.22  |
| 192 | 1900  | 45 | 643 | 1121 | 943  | 0.86 | 0.91 | -2.89 |
| 193 | 3092  | 45 | 395 | 793  | 961  | 1.26 | 0.89 | -4.88 |
| 194 | 5257  | 45 | 844 | 1536 | 1041 | 0.70 | 1.19 | 5.04  |
| 195 | 5994  | 45 | 236 | 1030 | 1129 | 1.15 | 2.28 | 2.65  |
| 196 | 6694  | 45 | 210 | 669  | 995  | 1.55 | 1.26 | -3.55 |
| 197 | 13483 | 45 | 641 | 1211 | 885  | 0.74 | 1.19 | 2.20  |
| 198 | 23574 | 45 | 548 | 943  | 829  | 0.90 | 0.86 | -3.70 |
| 199 | 26086 | 45 | 321 | 647  | 940  | 1.48 | 0.81 | -1.53 |
| 200 | 26704 | 45 | 848 | 1466 | 924  | 0.64 | 1.15 | 2.93  |
| 201 | 27838 | 45 | 537 | 1067 | 885  | 0.84 | 1.15 | 0.22  |
| 202 | 38625 | 45 | 478 | 987  | 931  | 0.97 | 1.09 | -3.93 |
| 203 | 40231 | 45 | 812 | 1533 | 1055 | 0.71 | 1.27 | 0.61  |
| 204 | 61089 | 45 | 318 | 739  | 963  | 1.34 | 1.01 | -3.39 |
| 205 | 81638 | 45 | 802 | 1501 | 1011 | 0.69 | 1.28 | 3.38  |
| 206 | 890   | 45 | 833 | 1613 | 1117 | 0.71 | 1.33 | 6.02  |
| 207 | 16236 | 45 | 780 | 1448 | 958  | 0.67 | 1.28 | 3.07  |
| 208 | 918   | 45 | 609 | 1168 | 860  | 0.75 | 1.21 | 1.30  |
| 209 | 3784  | 45 | 653 | 1451 | 986  | 0.69 | 1.87 | 0.77  |
| 210 | 4908  | 45 | 404 | 1334 | 1130 | 0.88 | 2.58 | 2.17  |
| 211 | 18187 | 45 | 581 | 1077 | 900  | 0.85 | 1.02 | -0.48 |
| 212 | 25367 | 45 | 246 | 684  | 994  | 1.50 | 1.13 | -3.53 |
| 213 | 29247 | 45 | 342 | 671  | 938  | 1.43 | 0.80 | -2.37 |
| 214 | 54144 | 45 | 669 | 1302 | 873  | 0.68 | 1.40 | 2.89  |
| 215 | 59115 | 45 | 401 | 849  | 969  | 1.18 | 0.99 | -3.12 |
| 216 | 62724 | 45 | 807 | 1547 | 1059 | 0.70 | 1.32 | 2.85  |
| 217 | 1420  | 45 | 718 | 1440 | 1153 | 0.82 | 1.21 | 5.69  |
| 218 | 769   | 45 | 959 | 1356 | 802  | 0.60 | 0.74 | -0.06 |
| 219 | 2082  | 43 | 742 | 889  | 982  | 1.13 | 0.38 | -4.62 |
| 220 | 4053  | 45 | 841 | 1471 | 971  | 0.68 | 1.13 | 10.30 |

*Southeast Rivers Basin*

|     |       |    |      |      |      |      |      |       |
|-----|-------|----|------|------|------|------|------|-------|
| 221 | 1356  | 45 | 853  | 1536 | 1190 | 0.80 | 1.03 | 2.57  |
| 222 | 1719  | 45 | 683  | 1497 | 1147 | 0.78 | 1.49 | 2.99  |
| 223 | 1930  | 45 | 1203 | 1584 | 1245 | 0.81 | 0.53 | -1.92 |
| 224 | 3302  | 45 | 744  | 1475 | 1154 | 0.80 | 1.22 | 3.14  |
| 225 | 8490  | 45 | 997  | 1587 | 1344 | 0.87 | 0.77 | 2.59  |
| 226 | 12669 | 45 | 1047 | 1744 | 1132 | 0.67 | 1.02 | 1.74  |

|     |       |    |      |      |      |      |      |       |
|-----|-------|----|------|------|------|------|------|-------|
| 227 | 13500 | 45 | 1021 | 1625 | 1172 | 0.74 | 0.85 | 0.60  |
| 228 | 5953  | 45 | 724  | 1554 | 1150 | 0.76 | 1.51 | 3.82  |
| 229 | 54500 | 45 | 964  | 1712 | 1196 | 0.72 | 1.10 | 1.81  |
| 230 | 2475  | 45 | 932  | 1567 | 1192 | 0.78 | 0.91 | 1.37  |
| 231 | 5060  | 45 | 983  | 1469 | 1445 | 1.01 | 0.63 | 1.19  |
| 232 | 5424  | 45 | 1126 | 1684 | 1156 | 0.71 | 0.77 | 5.44  |
| 233 | 3270  | 43 | 1239 | 1549 | 1192 | 0.79 | 0.47 | -2.31 |

*Pearl River Basin*

|     |       |    |      |      |      |      |      |       |
|-----|-------|----|------|------|------|------|------|-------|
| 234 | 3445  | 45 | 430  | 1175 | 1168 | 1.01 | 1.53 | 2.14  |
| 235 | 4374  | 45 | 1296 | 1665 | 1109 | 0.69 | 0.54 | -1.03 |
| 236 | 5734  | 45 | 1037 | 1774 | 1126 | 0.66 | 1.11 | -0.11 |
| 237 | 25116 | 45 | 250  | 992  | 1275 | 1.31 | 1.73 | -0.53 |
| 238 | 45413 | 45 | 869  | 1482 | 973  | 0.67 | 1.07 | 1.58  |
| 239 | 1776  | 45 | 940  | 1754 | 1129 | 0.67 | 1.35 | -3.31 |
| 240 | 3086  | 45 | 591  | 1614 | 1248 | 0.79 | 2.25 | -2.90 |
| 241 | 4281  | 45 | 661  | 1465 | 1084 | 0.75 | 1.61 | -1.11 |
| 242 | 14963 | 45 | 1129 | 1651 | 1041 | 0.64 | 0.77 | 1.13  |
| 243 | 21530 | 45 | 898  | 1466 | 963  | 0.67 | 0.97 | 3.79  |
| 244 | 51467 | 45 | 360  | 1024 | 1248 | 1.24 | 1.32 | -0.22 |
| 245 | 2762  | 45 | 1342 | 1596 | 1012 | 0.65 | 0.43 | 3.98  |
| 246 | 2866  | 45 | 1317 | 1873 | 1184 | 0.66 | 0.72 | 0.32  |
| 247 | 3164  | 45 | 825  | 1687 | 1129 | 0.69 | 1.58 | 2.35  |
| 248 | 6645  | 45 | 763  | 1639 | 1156 | 0.73 | 1.62 | -0.44 |
| 249 | 7699  | 45 | 830  | 1609 | 1118 | 0.72 | 1.33 | 1.31  |
| 250 | 26823 | 45 | 631  | 1630 | 1113 | 0.69 | 2.77 | 0.48  |
| 251 | 613   | 45 | 954  | 1694 | 1193 | 0.72 | 1.09 | 1.42  |
| 252 | 2473  | 45 | 441  | 1210 | 1057 | 0.89 | 1.82 | -0.58 |
| 253 | 9007  | 45 | 1156 | 1590 | 983  | 0.64 | 0.67 | 4.75  |
| 254 | 15793 | 45 | 933  | 1694 | 1129 | 0.69 | 1.21 | 3.63  |
| 255 | 21720 | 45 | 399  | 1234 | 1114 | 0.91 | 2.06 | 0.66  |
| 256 | 3445  | 45 | 465  | 1533 | 1109 | 0.74 | 4.94 | 0.04  |
| 257 | 4839  | 45 | 1163 | 1415 | 949  | 0.68 | 0.46 | 0.33  |
| 258 | 2016  | 45 | 1267 | 1657 | 1162 | 0.73 | 0.55 | 0.36  |
| 259 | 5888  | 45 | 937  | 1658 | 1092 | 0.68 | 1.16 | -0.82 |

*Southwest Rivers Basin*

|     |        |    |      |      |      |      |      |       |
|-----|--------|----|------|------|------|------|------|-------|
| 260 | 3128   | 45 | 267  | 1051 | 1228 | 1.18 | 1.90 | -0.71 |
| 261 | 4185   | 45 | 697  | 1270 | 1207 | 0.96 | 0.90 | 2.33  |
| 262 | 4330   | 45 | 470  | 1045 | 1340 | 1.30 | 0.97 | -0.41 |
| 263 | 6306   | 45 | 398  | 1225 | 1236 | 1.02 | 1.75 | 0.22  |
| 264 | 7762   | 45 | 1029 | 1278 | 1284 | 1.02 | 0.42 | 0.02  |
| 265 | 17909  | 45 | 243  | 495  | 1057 | 2.17 | 0.69 | 0.50  |
| 266 | 26235  | 45 | 354  | 470  | 1260 | 2.75 | 0.38 | 1.37  |
| 267 | 6609   | 45 | 702  | 1495 | 1239 | 0.84 | 1.30 | -1.36 |
| 268 | 8749   | 45 | 581  | 1338 | 1237 | 0.93 | 1.31 | -0.35 |
| 269 | 16524  | 45 | 718  | 1247 | 1278 | 1.04 | 0.80 | -2.16 |
| 270 | 108527 | 45 | 355  | 683  | 1122 | 1.66 | 0.72 | 0.81  |
| 271 | 110224 | 45 | 492  | 628  | 1117 | 1.80 | 0.38 | 1.78  |

|                           |        |    |     |      |      |       |      |       |  |
|---------------------------|--------|----|-----|------|------|-------|------|-------|--|
| 272                       | 50608  | 33 | 283 | 538  | 1071 | 2.03  | 0.66 | 0.60  |  |
| 273                       | 142963 | 45 | 397 | 1442 | 1244 | 0.87  | 2.88 | -0.17 |  |
| 274                       | 7098   | 45 | 167 | 1216 | 1291 | 1.08  | 3.95 | 0.39  |  |
| <i>Inland River Basin</i> |        |    |     |      |      |       |      |       |  |
| 275                       | 877    | 31 | 64  | 301  | 1214 | 4.12  | 0.97 | -0.49 |  |
| 276                       | 2053   | 43 | 67  | 251  | 1224 | 4.98  | 0.80 | 0.57  |  |
| 277                       | 2240   | 45 | 75  | 238  | 1109 | 4.81  | 0.73 | 0.33  |  |
| 278                       | 4589   | 44 | 156 | 267  | 1086 | 4.14  | 0.47 | -0.18 |  |
| 279                       | 6883   | 45 | 92  | 206  | 1148 | 5.78  | 0.55 | 0.03  |  |
| 280                       | 851    | 44 | 249 | 314  | 1132 | 3.68  | 0.32 | -1.28 |  |
| 281                       | 1077   | 44 | 267 | 319  | 1125 | 3.57  | 0.29 | -1.00 |  |
| 282                       | 1581   | 35 | 142 | 185  | 1172 | 6.49  | 0.31 | 0.14  |  |
| 283                       | 10009  | 45 | 156 | 284  | 1103 | 3.97  | 0.51 | 0.39  |  |
| 284                       | 10961  | 45 | 83  | 172  | 1222 | 7.43  | 0.49 | 0.65  |  |
| 285                       | 14325  | 45 | 24  | 101  | 1311 | 13.82 | 0.64 | 0.24  |  |
| 286                       | 27430  | 21 | 287 | 562  | 1035 | 2.04  | 0.67 | 3.00  |  |
| 287                       | 18375  | 21 | 53  | 180  | 1106 | 7.54  | 0.66 | 0.71  |  |
| 288                       | 4637   | 21 | 276 | 511  | 1081 | 2.38  | 0.60 | 3.05  |  |
| 289                       | 19022  | 21 | 182 | 382  | 1086 | 3.11  | 0.62 | 3.95  |  |
| 290                       | 481    | 21 | 176 | 492  | 1412 | 3.81  | 0.72 | 2.41  |  |
| 291                       | 924    | 21 | 274 | 433  | 1214 | 3.04  | 0.47 | 3.19  |  |

**Table S2.** Projected mean annual precipitation  $\bar{P}$  and potential evaporation  $\bar{E}_p$  of the 291 study catchments for five global climate models (GFDL-ESM2M, HadGEM2-ES, IPSL-CM5A-LR, MIROC-ESM-CHEM and NorESM1-M) under scenarios RCP2.6, 4.5 and 8.5, and respective estimated changes in mean annual runoff  $\Delta\bar{Q}$ .

| Catchment<br>number | $\bar{P}$<br>(mm) |        |        | $\bar{E}_p$<br>(mm) |        |        | $\Delta\bar{Q}$<br>(mm) |        |        |
|---------------------|-------------------|--------|--------|---------------------|--------|--------|-------------------------|--------|--------|
|                     | RCP2.6            | RCP4.5 | RCP8.5 | RCP2.6              | RCP4.5 | RCP8.5 | RCP2.6                  | RCP4.5 | RCP8.5 |
| <i>GFDL-ESM2M</i>   |                   |        |        |                     |        |        |                         |        |        |
| 1                   | 524               | 529    | 522    | 1025                | 1039   | 1036   | 9                       | 10     | 8      |
| 2                   | 609               | 626    | 628    | 874                 | 870    | 879    | 37                      | 47     | 46     |
| 3                   | 582               | 574    | 592    | 651                 | 646    | 645    | 58                      | 54     | 63     |
| 4                   | 617               | 631    | 636    | 879                 | 885    | 885    | 34                      | 42     | 46     |
| 5                   | 479               | 470    | 475    | 724                 | 723    | 723    | 26                      | 20     | 24     |
| 6                   | 566               | 556    | 577    | 930                 | 951    | 943    | 15                      | 7      | 19     |
| 7                   | 721               | 693    | 741    | 967                 | 992    | 981    | 104                     | 79     | 118    |
| 8                   | 499               | 497    | 493    | 909                 | 916    | 925    | 24                      | 22     | 19     |
| 9                   | 533               | 534    | 545    | 905                 | 919    | 915    | 7                       | 6      | 10     |
| 10                  | 719               | 723    | 739    | 647                 | 642    | 642    | 84                      | 86     | 90     |
| 11                  | 536               | 521    | 548    | 956                 | 980    | 969    | -9                      | -19    | -5     |



|    |      |      |      |      |      |      |     |     |     |
|----|------|------|------|------|------|------|-----|-----|-----|
| 12 | 583  | 600  | 601  | 872  | 869  | 878  | 22  | 31  | 31  |
| 13 | 577  | 561  | 594  | 973  | 1002 | 986  | -44 | -58 | -38 |
| 14 | 548  | 558  | 556  | 948  | 953  | 955  | 18  | 23  | 21  |
| 15 | 465  | 442  | 456  | 754  | 756  | 761  | 13  | -4  | 6   |
| 16 | 525  | 532  | 528  | 977  | 987  | 986  | 11  | 13  | 12  |
| 17 | 525  | 510  | 537  | 635  | 627  | 630  | 19  | 12  | 26  |
| 18 | 434  | 433  | 429  | 1047 | 1059 | 1065 | 3   | 2   | 0   |
| 19 | 575  | 564  | 586  | 1238 | 1269 | 1261 | -7  | -12 | -6  |
| 20 | 662  | 649  | 680  | 1168 | 1198 | 1191 | -1  | -10 | 2   |
| 21 | 541  | 526  | 554  | 956  | 982  | 970  | -27 | -39 | -20 |
| 22 | 560  | 564  | 574  | 911  | 925  | 921  | 17  | 17  | 21  |
| 23 | 421  | 424  | 423  | 1171 | 1181 | 1184 | 3   | 3   | 3   |
| 24 | 789  | 771  | 815  | 1124 | 1154 | 1142 | -18 | -34 | -8  |
| 25 | 450  | 436  | 444  | 728  | 728  | 729  | 11  | 3   | 8   |
| 26 | 623  | 610  | 637  | 1210 | 1240 | 1233 | 12  | 3   | 16  |
| 27 | 576  | 590  | 591  | 886  | 885  | 892  | 28  | 37  | 36  |
| 28 | 532  | 526  | 542  | 946  | 966  | 959  | -2  | -7  | 1   |
| 29 | 482  | 479  | 483  | 834  | 834  | 837  | 2   | 1   | 2   |
| 30 | 648  | 636  | 664  | 1059 | 1086 | 1077 | 23  | 13  | 28  |
| 31 | 490  | 484  | 486  | 841  | 843  | 850  | 4   | 0   | 1   |
| 32 | 496  | 491  | 491  | 869  | 873  | 883  | 17  | 14  | 13  |
| 33 | 573  | 580  | 580  | 976  | 990  | 987  | 19  | 21  | 22  |
| 34 | 482  | 471  | 479  | 758  | 758  | 759  | 18  | 11  | 16  |
| 35 | 582  | 572  | 597  | 962  | 987  | 977  | -9  | -19 | -2  |
| 36 | 419  | 416  | 416  | 921  | 923  | 939  | 6   | 4   | 3   |
| 37 | 733  | 700  | 759  | 755  | 750  | 769  | 53  | 38  | 63  |
| 38 | 950  | 912  | 981  | 1155 | 1180 | 1170 | 20  | -14 | 41  |
| 39 | 704  | 661  | 728  | 1557 | 1581 | 1575 | -23 | -48 | -13 |
| 40 | 1066 | 1029 | 1102 | 1116 | 1141 | 1129 | 93  | 59  | 120 |
| 41 | 715  | 677  | 739  | 785  | 777  | 799  | 47  | 26  | 59  |
| 42 | 639  | 625  | 656  | 1217 | 1248 | 1240 | -58 | -69 | -54 |
| 43 | 543  | 528  | 557  | 782  | 772  | 792  | 29  | 26  | 31  |
| 44 | 636  | 621  | 669  | 1407 | 1430 | 1433 | 2   | -8  | 16  |
| 45 | 546  | 536  | 574  | 1335 | 1355 | 1358 | -4  | -9  | 5   |
| 46 | 815  | 798  | 844  | 1062 | 1090 | 1076 | -30 | -49 | -11 |
| 47 | 872  | 825  | 897  | 1241 | 1263 | 1255 | 19  | -19 | 36  |
| 48 | 524  | 511  | 534  | 1366 | 1390 | 1381 | 7   | 3   | 9   |
| 49 | 405  | 405  | 406  | 1351 | 1363 | 1364 | -2  | -2  | -2  |
| 50 | 462  | 456  | 475  | 1290 | 1305 | 1306 | 4   | 2   | 6   |
| 51 | 408  | 413  | 408  | 1175 | 1179 | 1182 | 10  | 11  | 9   |
| 52 | 439  | 441  | 450  | 1279 | 1289 | 1300 | -4  | -4  | -3  |
| 53 | 694  | 678  | 713  | 1209 | 1241 | 1231 | -10 | -19 | -8  |
| 54 | 874  | 854  | 906  | 1054 | 1081 | 1066 | -8  | -29 | 13  |
| 55 | 434  | 419  | 446  | 1425 | 1440 | 1415 | 0   | -3  | 3   |
| 56 | 610  | 560  | 633  | 1406 | 1425 | 1412 | -6  | -24 | 1   |
| 57 | 431  | 433  | 440  | 1095 | 1093 | 1108 | 10  | 11  | 12  |
| 58 | 493  | 497  | 512  | 1229 | 1237 | 1241 | 15  | 16  | 21  |
| 59 | 546  | 546  | 567  | 1250 | 1263 | 1276 | -22 | -24 | -18 |
| 60 | 416  | 417  | 419  | 1282 | 1286 | 1290 | 0   | 0   | 1   |
| 61 | 576  | 575  | 600  | 1238 | 1253 | 1266 | -24 | -26 | -17 |

|     |     |     |     |      |      |      |     |     |     |
|-----|-----|-----|-----|------|------|------|-----|-----|-----|
| 62  | 455 | 441 | 473 | 1271 | 1282 | 1272 | -19 | -26 | -11 |
| 63  | 396 | 386 | 407 | 1383 | 1393 | 1375 | 1   | -1  | 3   |
| 64  | 564 | 510 | 588 | 994  | 993  | 1008 | 12  | 3   | 16  |
| 65  | 456 | 457 | 468 | 1329 | 1338 | 1334 | 7   | 7   | 10  |
| 66  | 565 | 559 | 588 | 957  | 956  | 971  | 30  | 28  | 37  |
| 67  | 569 | 556 | 600 | 1448 | 1464 | 1465 | 15  | 8   | 27  |
| 68  | 569 | 531 | 593 | 1403 | 1418 | 1402 | -4  | -24 | 7   |
| 69  | 461 | 461 | 477 | 1304 | 1313 | 1313 | 4   | 4   | 8   |
| 70  | 506 | 509 | 526 | 1201 | 1210 | 1216 | 6   | 7   | 11  |
| 71  | 722 | 712 | 762 | 1405 | 1428 | 1435 | 14  | 7   | 28  |
| 72  | 464 | 466 | 473 | 1222 | 1230 | 1237 | 5   | 5   | 6   |
| 73  | 437 | 434 | 450 | 800  | 797  | 810  | 10  | 10  | 14  |
| 74  | 435 | 423 | 449 | 1384 | 1393 | 1378 | 0   | -2  | 3   |
| 75  | 788 | 759 | 819 | 1287 | 1294 | 1281 | 76  | 67  | 85  |
| 76  | 508 | 490 | 529 | 1297 | 1308 | 1296 | 2   | -3  | 7   |
| 77  | 479 | 464 | 502 | 1351 | 1364 | 1357 | -1  | -7  | 8   |
| 78  | 601 | 588 | 633 | 1460 | 1482 | 1485 | -25 | -32 | -16 |
| 79  | 663 | 638 | 689 | 1280 | 1290 | 1278 | 44  | 37  | 52  |
| 80  | 484 | 487 | 499 | 1251 | 1261 | 1272 | -1  | -1  | 2   |
| 81  | 722 | 712 | 762 | 1405 | 1428 | 1435 | 7   | 0   | 20  |
| 82  | 571 | 524 | 594 | 1436 | 1454 | 1438 | -11 | -25 | -5  |
| 83  | 568 | 519 | 591 | 1466 | 1487 | 1469 | -12 | -29 | -5  |
| 84  | 493 | 495 | 508 | 1242 | 1251 | 1261 | 1   | 1   | 4   |
| 85  | 506 | 509 | 526 | 1201 | 1210 | 1216 | 16  | 17  | 21  |
| 86  | 430 | 413 | 457 | 688  | 684  | 695  | 15  | 10  | 23  |
| 87  | 589 | 543 | 615 | 1410 | 1429 | 1420 | -17 | -29 | -11 |
| 88  | 638 | 607 | 665 | 1362 | 1375 | 1358 | 19  | 12  | 25  |
| 89  | 440 | 439 | 453 | 1318 | 1327 | 1326 | 3   | 3   | 6   |
| 90  | 508 | 490 | 525 | 1388 | 1400 | 1380 | 5   | 3   | 8   |
| 91  | 751 | 701 | 770 | 1513 | 1546 | 1535 | -41 | -71 | -33 |
| 92  | 462 | 443 | 489 | 1413 | 1431 | 1408 | -15 | -21 | -8  |
| 93  | 314 | 298 | 315 | 1547 | 1569 | 1534 | -1  | -3  | 0   |
| 94  | 725 | 686 | 708 | 1322 | 1339 | 1362 | 0   | -24 | -15 |
| 95  | 429 | 413 | 435 | 1453 | 1471 | 1442 | 9   | 5   | 10  |
| 96  | 482 | 463 | 513 | 1403 | 1419 | 1402 | -16 | -22 | -7  |
| 97  | 558 | 549 | 555 | 1274 | 1282 | 1293 | -6  | -11 | -9  |
| 98  | 439 | 422 | 461 | 1603 | 1628 | 1587 | -3  | -9  | 5   |
| 99  | 553 | 515 | 580 | 1421 | 1442 | 1438 | -34 | -50 | -25 |
| 100 | 490 | 476 | 497 | 1354 | 1368 | 1371 | -6  | -9  | -5  |
| 101 | 546 | 517 | 570 | 1483 | 1499 | 1495 | -18 | -23 | -15 |
| 102 | 608 | 595 | 600 | 1151 | 1159 | 1168 | -4  | -13 | -11 |
| 103 | 485 | 472 | 490 | 1344 | 1357 | 1362 | 1   | -1  | 1   |
| 104 | 538 | 510 | 567 | 681  | 677  | 679  | 18  | 14  | 21  |
| 105 | 431 | 414 | 462 | 1508 | 1529 | 1503 | -18 | -24 | -8  |
| 106 | 449 | 432 | 470 | 1562 | 1589 | 1549 | -3  | -9  | 4   |
| 107 | 531 | 503 | 559 | 1454 | 1473 | 1469 | -24 | -31 | -20 |
| 108 | 568 | 536 | 584 | 1461 | 1478 | 1479 | -30 | -38 | -27 |
| 109 | 530 | 516 | 529 | 1296 | 1309 | 1318 | 0   | -3  | -1  |
| 110 | 462 | 453 | 474 | 1205 | 1208 | 1214 | 35  | 31  | 40  |
| 111 | 576 | 532 | 605 | 1357 | 1377 | 1374 | -33 | -49 | -26 |

|     |      |      |      |      |      |      |      |      |      |
|-----|------|------|------|------|------|------|------|------|------|
| 112 | 492  | 472  | 534  | 1461 | 1479 | 1464 | -9   | -15  | 0    |
| 113 | 505  | 484  | 546  | 1458 | 1475 | 1460 | -14  | -20  | -6   |
| 114 | 386  | 377  | 393  | 1354 | 1367 | 1371 | -5   | -6   | -5   |
| 115 | 484  | 460  | 514  | 1437 | 1456 | 1447 | -21  | -27  | -16  |
| 116 | 379  | 365  | 407  | 1484 | 1502 | 1489 | -4   | -6   | -1   |
| 117 | 433  | 416  | 456  | 1629 | 1655 | 1612 | 5    | -1   | 12   |
| 118 | 505  | 484  | 546  | 1170 | 1159 | 1168 | 4    | 0    | 13   |
| 119 | 451  | 433  | 467  | 1544 | 1571 | 1531 | 0    | -6   | 4    |
| 120 | 543  | 536  | 541  | 1241 | 1248 | 1259 | 30   | 26   | 27   |
| 121 | 540  | 514  | 575  | 1471 | 1489 | 1479 | -11  | -17  | -4   |
| 122 | 417  | 409  | 424  | 1189 | 1181 | 1192 | 15   | 13   | 17   |
| 123 | 804  | 738  | 821  | 1577 | 1617 | 1595 | 9    | -19  | 14   |
| 124 | 804  | 738  | 821  | 1193 | 1186 | 1199 | 46   | 22   | 52   |
| 125 | 584  | 553  | 572  | 1437 | 1458 | 1486 | -93  | -111 | -106 |
| 126 | 419  | 408  | 425  | 1350 | 1363 | 1368 | -2   | -3   | -2   |
| 127 | 658  | 622  | 644  | 1343 | 1363 | 1388 | -35  | -53  | -47  |
| 128 | 567  | 528  | 593  | 1416 | 1438 | 1436 | -28  | -40  | -22  |
| 129 | 531  | 510  | 538  | 1398 | 1413 | 1415 | -11  | -18  | -11  |
| 130 | 383  | 372  | 400  | 1442 | 1458 | 1453 | 0    | -1   | 1    |
| 131 | 595  | 583  | 587  | 1220 | 1228 | 1238 | -23  | -32  | -31  |
| 132 | 472  | 462  | 489  | 1211 | 1216 | 1220 | 91   | 83   | 103  |
| 133 | 444  | 435  | 453  | 1297 | 1303 | 1310 | 25   | 21   | 28   |
| 134 | 540  | 511  | 565  | 1468 | 1485 | 1481 | -13  | -19  | -10  |
| 135 | 553  | 538  | 548  | 1280 | 1293 | 1301 | -1   | -7   | -4   |
| 136 | 496  | 466  | 520  | 1440 | 1459 | 1446 | -15  | -20  | -12  |
| 137 | 440  | 422  | 463  | 1475 | 1492 | 1484 | -4   | -6   | -2   |
| 138 | 396  | 381  | 425  | 1613 | 1636 | 1597 | 6    | -2   | 20   |
| 139 | 357  | 355  | 357  | 1139 | 1144 | 1153 | 5    | 5    | 5    |
| 140 | 1514 | 1455 | 430  | 813  | 810  | 798  | 148  | 105  | 63   |
| 141 | 1679 | 1625 | 196  | 814  | 811  | 773  | 102  | 58   | -9   |
| 142 | 588  | 573  | 191  | 1156 | 1166 | 729  | 1    | -11  | -9   |
| 143 | 1377 | 1309 | 262  | 792  | 786  | 1050 | 103  | 52   | -2   |
| 144 | 632  | 616  | 282  | 1213 | 1227 | 1137 | -23  | -34  | 45   |
| 145 | 732  | 709  | 263  | 1184 | 1197 | 682  | -67  | -87  | -34  |
| 146 | 1104 | 1079 | 317  | 1295 | 1305 | 692  | -232 | -257 | 6    |
| 147 | 1167 | 1132 | 128  | 1329 | 1342 | 701  | -188 | -220 | -42  |
| 148 | 657  | 638  | 254  | 1265 | 1279 | 1080 | -74  | -88  | -20  |
| 149 | 655  | 620  | 259  | 1329 | 1344 | 1144 | -70  | -91  | 55   |
| 150 | 901  | 872  | 139  | 1254 | 1263 | 1158 | -228 | -253 | 15   |
| 151 | 603  | 588  | 1416 | 1240 | 1253 | 822  | -8   | -15  | 70   |
| 152 | 1466 | 1423 | 1563 | 1336 | 1341 | 823  | -197 | -235 | 2    |
| 153 | 1123 | 1108 | 577  | 1233 | 1240 | 1174 | -180 | -195 | -9   |
| 154 | 796  | 743  | 1273 | 1487 | 1504 | 801  | -63  | -87  | 20   |
| 155 | 1503 | 1456 | 617  | 1381 | 1389 | 1236 | -149 | -191 | -35  |
| 156 | 1630 | 1585 | 705  | 1304 | 1309 | 1211 | -73  | -113 | -92  |
| 157 | 1893 | 1849 | 1083 | 1278 | 1283 | 1339 | 45   | 7    | -268 |
| 158 | 622  | 592  | 1134 | 1257 | 1270 | 1371 | -140 | -162 | -230 |
| 159 | 802  | 765  | 640  | 1414 | 1426 | 1289 | -102 | -125 | -89  |
| 160 | 1476 | 1492 | 638  | 1391 | 1385 | 1365 | -163 | -149 | -85  |
| 161 | 1541 | 1538 | 860  | 1496 | 1486 | 1276 | -228 | -227 | -267 |

|     |      |      |      |      |      |      |      |      |      |
|-----|------|------|------|------|------|------|------|------|------|
| 162 | 630  | 614  | 590  | 1193 | 1202 | 1261 | -35  | -47  | -15  |
| 163 | 795  | 752  | 1404 | 1270 | 1285 | 1388 | -132 | -166 | -270 |
| 164 | 1600 | 1543 | 1091 | 1293 | 1299 | 1270 | -74  | -123 | -219 |
| 165 | 807  | 756  | 762  | 1319 | 1334 | 1479 | -117 | -154 | -75  |
| 166 | 859  | 832  | 1460 | 1245 | 1262 | 1426 | -111 | -135 | -198 |
| 167 | 1022 | 1000 | 1553 | 1215 | 1230 | 1357 | -164 | -187 | -159 |
| 168 | 740  | 713  | 1765 | 1208 | 1221 | 1347 | 32   | 11   | -86  |
| 169 | 1326 | 1259 | 594  | 846  | 830  | 1295 | 122  | 65   | -165 |
| 170 | 1573 | 1528 | 746  | 833  | 815  | 1476 | 81   | 54   | -145 |
| 171 | 1249 | 1237 | 1432 | 1238 | 1247 | 1424 | -258 | -271 | -213 |
| 172 | 1194 | 1174 | 1499 | 809  | 792  | 1522 | -134 | -150 | -274 |
| 173 | 1092 | 1082 | 618  | 1275 | 1290 | 1209 | -401 | -417 | -46  |
| 174 | 1185 | 1176 | 749  | 1256 | 1265 | 1280 | -299 | -310 | -168 |
| 175 | 1552 | 1547 | 1527 | 791  | 775  | 1350 | 107  | 110  | -156 |
| 176 | 1153 | 1137 | 762  | 1296 | 1306 | 1324 | -234 | -251 | -148 |
| 177 | 1901 | 1853 | 834  | 1266 | 1270 | 1252 | 68   | 27   | -130 |
| 178 | 1101 | 1076 | 977  | 1309 | 1321 | 1247 | -264 | -289 | -210 |
| 179 | 1161 | 1147 | 718  | 1221 | 1228 | 1222 | -127 | -142 | 15   |
| 180 | 1173 | 1135 | 1230 | 1333 | 1347 | 849  | -176 | -211 | 37   |
| 181 | 959  | 923  | 1478 | 1281 | 1291 | 833  | -157 | -188 | 6    |
| 182 | 620  | 605  | 1205 | 1231 | 1244 | 1287 | -18  | -27  | -310 |
| 183 | 766  | 730  | 1144 | 1407 | 1422 | 808  | -89  | -110 | -180 |
| 184 | 599  | 584  | 1063 | 1183 | 1193 | 1322 | -49  | -61  | -450 |
| 185 | 963  | 939  | 1146 | 1251 | 1256 | 1304 | -257 | -277 | -350 |
| 186 | 983  | 948  | 1483 | 1359 | 1377 | 791  | -324 | -360 | 50   |
| 187 | 807  | 783  | 1136 | 1184 | 1197 | 1345 | -65  | -85  | -263 |
| 188 | 1467 | 1452 | 1768 | 1367 | 1369 | 1332 | -163 | -176 | -69  |
| 189 | 1128 | 1112 | 1081 | 737  | 726  | 1356 | 39   | 30   | -301 |
| 190 | 819  | 794  | 1126 | 718  | 708  | 1256 | -249 | -267 | -168 |
| 191 | 2042 | 1997 | 1137 | 1229 | 1232 | 1375 | 302  | 264  | -220 |
| 192 | 958  | 938  | 917  | 1300 | 1309 | 1304 | -226 | -245 | -196 |
| 193 | 810  | 790  | 605  | 740  | 732  | 1252 | 52   | 39   | -28  |
| 194 | 1536 | 1535 | 717  | 1424 | 1423 | 1473 | -152 | -152 | -127 |
| 195 | 1087 | 1052 | 586  | 1399 | 1405 | 1199 | -46  | -67  | -60  |
| 196 | 703  | 685  | 928  | 1218 | 1233 | 1280 | -18  | -30  | -296 |
| 197 | 1160 | 1121 | 928  | 1323 | 1339 | 1368 | -207 | -243 | -369 |
| 198 | 917  | 892  | 772  | 1266 | 1283 | 1215 | -129 | -153 | -96  |
| 199 | 643  | 626  | 1425 | 1162 | 1173 | 1408 | -35  | -49  | -214 |
| 200 | 1438 | 1412 | 1092 | 1327 | 1331 | 743  | -191 | -214 | 8    |
| 201 | 1072 | 1035 | 785  | 1292 | 1300 | 724  | -129 | -161 | -277 |
| 202 | 962  | 938  | 1892 | 1231 | 1246 | 1295 | -100 | -122 | 153  |
| 203 | 1502 | 1504 | 902  | 1442 | 1434 | 1356 | -184 | -179 | -286 |
| 204 | 788  | 769  | 776  | 1201 | 1215 | 744  | -11  | -26  | 27   |
| 205 | 1495 | 1473 | 1463 | 1363 | 1365 | 1470 | -154 | -173 | -230 |
| 206 | 1584 | 1548 | 1034 | 735  | 733  | 1462 | 138  | 109  | -93  |
| 207 | 1360 | 1330 | 681  | 1355 | 1358 | 1244 | -244 | -270 | -34  |
| 208 | 1154 | 1143 | 1123 | 1218 | 1227 | 1366 | -147 | -159 | -252 |
| 209 | 1437 | 1397 | 872  | 1315 | 1325 | 1284 | -188 | -227 | -169 |
| 210 | 1519 | 1461 | 623  | 1340 | 1346 | 1177 | 31   | -13  | -52  |
| 211 | 1061 | 1024 | 1402 | 1291 | 1300 | 1380 | -128 | -160 | -243 |

|     |      |      |      |      |      |      |      |      |      |
|-----|------|------|------|------|------|------|------|------|------|
| 212 | 711  | 693  | 1031 | 1214 | 1228 | 1320 | -21  | -33  | -171 |
| 213 | 652  | 635  | 922  | 1167 | 1178 | 1272 | -47  | -62  | -140 |
| 214 | 1230 | 1202 | 1450 | 1329 | 1339 | 1475 | -268 | -296 | -239 |
| 215 | 776  | 749  | 754  | 1230 | 1243 | 1223 | -106 | -128 | -38  |
| 216 | 1576 | 1572 | 1446 | 1420 | 1416 | 1405 | -129 | -131 | -212 |
| 217 | 1564 | 1528 | 1479 | 1264 | 1268 | 734  | 58   | 28   | 53   |
| 218 | 1244 | 1231 | 1323 | 1306 | 1313 | 1400 | -246 | -260 | -294 |
| 219 | 795  | 764  | 1121 | 705  | 696  | 1255 | -66  | -94  | -188 |
| 220 | 1471 | 1419 | 1392 | 1292 | 1298 | 1358 | -126 | -171 | -248 |
| 221 | 1825 | 1761 | 1412 | 1330 | 1338 | 1404 | 187  | 133  | -74  |
| 222 | 1522 | 1480 | 1018 | 1267 | 1272 | 1318 | -30  | -65  | -171 |
| 223 | 1815 | 1711 | 687  | 1266 | 1275 | 1238 | 201  | 107  | -39  |
| 224 | 1470 | 1424 | 630  | 1310 | 1317 | 1183 | -60  | -98  | -66  |
| 225 | 1730 | 1661 | 1204 | 1428 | 1419 | 1375 | 99   | 44   | -311 |
| 226 | 1982 | 1918 | 742  | 1332 | 1335 | 1269 | 125  | 71   | -139 |
| 227 | 1731 | 1653 | 1509 | 1258 | 1266 | 1460 | 64   | -4   | -202 |
| 228 | 1689 | 1626 | 1445 | 1270 | 1277 | 1330 | 54   | 1    | -58  |
| 229 | 1899 | 1819 | 1221 | 1341 | 1343 | 1358 | 100  | 34   | -281 |
| 230 | 2200 | 2101 | 749  | 1329 | 1338 | 702  | 477  | 393  | -108 |
| 231 | 1565 | 1476 | 1405 | 1542 | 1537 | 1345 | 64   | -9   | -202 |
| 232 | 1935 | 1863 | 1645 | 1212 | 1218 | 1403 | 199  | 136  | 19   |
| 233 | 2200 | 2101 | 1395 | 1329 | 1338 | 1336 | 569  | 478  | -157 |
| 234 | 1024 | 974  | 1638 | 1480 | 1498 | 1321 | -201 | -240 | 36   |
| 235 | 1777 | 1782 | 1342 | 1612 | 1603 | 1383 | 10   | 16   | -185 |
| 236 | 1889 | 1888 | 1628 | 1528 | 1515 | 1453 | -63  | -59  | 8    |
| 237 | 903  | 840  | 1845 | 1483 | 1496 | 1385 | -94  | -131 | -9   |
| 238 | 1428 | 1377 | 1580 | 1396 | 1417 | 1319 | -206 | -257 | -80  |
| 239 | 1820 | 1825 | 1539 | 1625 | 1612 | 1337 | -170 | -160 | -93  |
| 240 | 1709 | 1667 | 1760 | 1752 | 1749 | 1390 | -185 | -215 | -31  |
| 241 | 1399 | 1350 | 1966 | 1632 | 1645 | 1395 | -299 | -345 | 266  |
| 242 | 1737 | 1694 | 1450 | 1459 | 1468 | 1567 | -47  | -87  | -36  |
| 243 | 1437 | 1387 | 1782 | 1385 | 1405 | 1274 | -172 | -221 | 52   |
| 244 | 975  | 911  | 1966 | 1478 | 1492 | 1395 | -83  | -126 | 349  |
| 245 | 1854 | 1790 | 966  | 713  | 713  | 1503 | 280  | 221  | -248 |
| 246 | 1753 | 1797 | 1751 | 737  | 736  | 1622 | 14   | 52   | -15  |
| 247 | 1813 | 1819 | 1848 | 742  | 741  | 1541 | 289  | 294  | -103 |
| 248 | 1707 | 1685 | 858  | 1653 | 1650 | 1486 | -179 | -196 | -119 |
| 249 | 1673 | 1656 | 1370 | 1553 | 1539 | 1437 | -130 | -138 | -270 |
| 250 | 1674 | 1619 | 1786 | 1685 | 1691 | 1629 | -337 | -388 | -200 |
| 251 | 1956 | 1887 | 1654 | 1674 | 1681 | 1768 | 41   | -17  | -235 |
| 252 | 1238 | 1171 | 1328 | 1426 | 1443 | 1655 | -127 | -182 | -366 |
| 253 | 1715 | 1722 | 1688 | 1407 | 1403 | 1497 | 3    | 11   | -100 |
| 254 | 1808 | 1792 | 1383 | 1581 | 1567 | 1427 | -90  | -97  | -232 |
| 255 | 1154 | 1103 | 921  | 1480 | 1497 | 1487 | -204 | -246 | -119 |
| 256 | 1552 | 1487 | 1795 | 1657 | 1675 | 713  | -412 | -482 | 225  |
| 257 | 1384 | 1335 | 1729 | 1362 | 1381 | 737  | -88  | -135 | -7   |
| 258 | 1574 | 1547 | 1785 | 1658 | 1644 | 742  | -163 | -184 | 266  |
| 259 | 1842 | 1794 | 1671 | 1408 | 1398 | 1669 | 26   | -9   | -216 |
| 260 | 939  | 885  | 1615 | 1463 | 1473 | 1574 | -126 | -160 | -185 |
| 261 | 1213 | 1154 | 1583 | 1352 | 1365 | 1704 | -79  | -128 | -426 |

|     |      |      |      |      |      |      |      |      |      |
|-----|------|------|------|------|------|------|------|------|------|
| 262 | 1090 | 1040 | 1848 | 1159 | 1170 | 1695 | 65   | 28   | -55  |
| 263 | 1087 | 1042 | 1177 | 1347 | 1360 | 1450 | -126 | -160 | -180 |
| 264 | 1359 | 1313 | 1690 | 1279 | 1290 | 1436 | 74   | 31   | -26  |
| 265 | 544  | 538  | 1754 | 1070 | 1078 | 1594 | 32   | 27   | -140 |
| 266 | 485  | 469  | 1087 | 1280 | 1289 | 1504 | 12   | -2   | -260 |
| 267 | 1567 | 1476 | 1496 | 1507 | 1512 | 1686 | -40  | -111 | -483 |
| 268 | 1326 | 1248 | 1331 | 1483 | 1496 | 1405 | -87  | -148 | -142 |
| 269 | 1237 | 1167 | 1513 | 1474 | 1488 | 1667 | -47  | -105 | -219 |
| 270 | 688  | 667  | 1747 | 1163 | 1174 | 1438 | -1   | -18  | -64  |
| 271 | 627  | 605  | 877  | 1170 | 1178 | 1475 | -4   | -24  | -165 |
| 272 | 595  | 580  | 1211 | 1125 | 1138 | 1347 | 35   | 24   | -79  |
| 273 | 1255 | 1176 | 1075 | 845  | 824  | 1153 | 67   | 22   | 55   |
| 274 | 999  | 942  | 1094 | 1488 | 1503 | 1339 | -177 | -211 | -119 |
| 275 | 409  | 399  | 1370 | 796  | 782  | 1271 | 56   | 52   | 84   |
| 276 | 188  | 183  | 544  | 770  | 757  | 1089 | -12  | -14  | 30   |
| 277 | 189  | 183  | 480  | 726  | 714  | 1289 | -10  | -12  | 7    |
| 278 | 261  | 254  | 1499 | 1045 | 1051 | 1506 | -3   | -8   | -91  |
| 279 | 286  | 277  | 1292 | 1132 | 1138 | 1483 | 48   | 42   | -112 |
| 280 | 250  | 243  | 1197 | 679  | 667  | 1474 | -46  | -52  | -79  |
| 281 | 303  | 295  | 681  | 689  | 677  | 1178 | -7   | -13  | -8   |
| 282 | 135  | 128  | 619  | 696  | 686  | 1184 | -36  | -42  | -12  |
| 283 | 250  | 244  | 585  | 1075 | 1081 | 1152 | -23  | -27  | 26   |
| 284 | 263  | 255  | 1207 | 1139 | 1143 | 842  | 57   | 52   | 35   |
| 285 | 144  | 138  | 969  | 1153 | 1154 | 1490 | 16   | 14   | -193 |
| 286 | 392  | 358  | 380  | 1184 | 1182 | 1189 | -104 | -128 | -113 |
| 287 | 159  | 159  | 169  | 1370 | 1373 | 1373 | -7   | -7   | -3   |
| 288 | 155  | 129  | 160  | 1235 | 1236 | 1242 | -240 | -259 | -237 |
| 289 | 170  | 142  | 168  | 1280 | 1282 | 1287 | -134 | -153 | -136 |

*HadGEM2-ES*

|    |     |     |     |      |      |      |     |     |     |
|----|-----|-----|-----|------|------|------|-----|-----|-----|
| 1  | 559 | 556 | 560 | 1100 | 1111 | 1108 | 12  | 11  | 12  |
| 2  | 656 | 673 | 648 | 932  | 930  | 947  | 55  | 65  | 49  |
| 3  | 654 | 627 | 668 | 683  | 689  | 688  | 91  | 76  | 97  |
| 4  | 668 | 686 | 674 | 939  | 930  | 955  | 62  | 75  | 64  |
| 5  | 510 | 488 | 502 | 770  | 787  | 783  | 40  | 24  | 33  |
| 6  | 628 | 630 | 606 | 970  | 967  | 991  | 43  | 44  | 28  |
| 7  | 800 | 799 | 747 | 988  | 983  | 1002 | 162 | 162 | 120 |
| 8  | 544 | 522 | 533 | 999  | 1025 | 1021 | 40  | 26  | 32  |
| 9  | 585 | 601 | 576 | 953  | 947  | 978  | 23  | 30  | 16  |
| 10 | 786 | 799 | 751 | 677  | 685  | 685  | 100 | 103 | 90  |
| 11 | 605 | 609 | 566 | 988  | 984  | 1007 | 19  | 22  | -2  |
| 12 | 629 | 642 | 619 | 939  | 937  | 955  | 38  | 45  | 31  |
| 13 | 658 | 669 | 643 | 990  | 984  | 999  | -6  | 1   | -15 |
| 14 | 597 | 594 | 585 | 1014 | 1022 | 1033 | 35  | 33  | 27  |
| 15 | 491 | 449 | 460 | 815  | 839  | 838  | 25  | -8  | 0   |
| 16 | 567 | 563 | 562 | 1048 | 1057 | 1062 | 19  | 17  | 16  |
| 17 | 597 | 601 | 559 | 657  | 665  | 664  | 56  | 58  | 34  |
| 18 | 479 | 464 | 485 | 1138 | 1167 | 1149 | 15  | 7   | 16  |
| 19 | 653 | 635 | 675 | 1292 | 1307 | 1284 | 7   | 2   | 13  |

|    |      |      |      |      |      |      |     |     |     |
|----|------|------|------|------|------|------|-----|-----|-----|
| 20 | 746  | 749  | 762  | 1207 | 1215 | 1210 | 24  | 24  | 30  |
| 21 | 623  | 628  | 590  | 976  | 972  | 992  | 21  | 25  | -2  |
| 22 | 604  | 622  | 591  | 967  | 957  | 992  | 26  | 33  | 19  |
| 23 | 453  | 432  | 452  | 1211 | 1236 | 1217 | 8   | 3   | 7   |
| 24 | 856  | 896  | 879  | 1181 | 1176 | 1181 | 5   | 28  | 18  |
| 25 | 481  | 453  | 464  | 771  | 791  | 788  | 23  | 4   | 11  |
| 26 | 704  | 699  | 724  | 1254 | 1265 | 1252 | 44  | 41  | 53  |
| 27 | 622  | 629  | 610  | 951  | 953  | 970  | 47  | 50  | 38  |
| 28 | 586  | 590  | 569  | 995  | 992  | 1019 | 14  | 16  | 4   |
| 29 | 512  | 480  | 499  | 890  | 907  | 912  | 13  | -8  | 3   |
| 30 | 720  | 715  | 741  | 1095 | 1107 | 1104 | 54  | 50  | 64  |
| 31 | 530  | 489  | 506  | 918  | 938  | 941  | 20  | -8  | 2   |
| 32 | 540  | 509  | 520  | 956  | 980  | 980  | 34  | 13  | 20  |
| 33 | 633  | 624  | 637  | 1044 | 1052 | 1057 | 38  | 34  | 39  |
| 34 | 509  | 476  | 497  | 809  | 826  | 826  | 30  | 7   | 20  |
| 35 | 653  | 657  | 646  | 991  | 992  | 1009 | 29  | 31  | 22  |
| 36 | 438  | 426  | 424  | 1004 | 1027 | 1034 | 6   | -1  | -2  |
| 37 | 817  | 836  | 830  | 824  | 824  | 836  | 82  | 91  | 86  |
| 38 | 1049 | 1100 | 1059 | 1210 | 1187 | 1196 | 89  | 132 | 99  |
| 39 | 780  | 790  | 791  | 1636 | 1621 | 1613 | 6   | 13  | 14  |
| 40 | 1176 | 1243 | 1178 | 1186 | 1159 | 1170 | 172 | 230 | 175 |
| 41 | 792  | 828  | 799  | 841  | 842  | 855  | 84  | 105 | 86  |
| 42 | 713  | 725  | 737  | 1261 | 1267 | 1261 | -33 | -29 | -23 |
| 43 | 587  | 597  | 617  | 836  | 836  | 851  | 34  | 36  | 39  |
| 44 | 725  | 719  | 747  | 1445 | 1444 | 1424 | 44  | 41  | 58  |
| 45 | 616  | 605  | 651  | 1358 | 1359 | 1333 | 21  | 17  | 37  |
| 46 | 886  | 927  | 905  | 1129 | 1118 | 1124 | 11  | 44  | 26  |
| 47 | 960  | 1011 | 966  | 1292 | 1268 | 1275 | 76  | 117 | 83  |
| 48 | 558  | 561  | 587  | 1388 | 1405 | 1370 | 13  | 13  | 21  |
| 49 | 442  | 414  | 442  | 1367 | 1395 | 1372 | 4   | -2  | 4   |
| 50 | 482  | 477  | 507  | 1316 | 1330 | 1298 | 7   | 6   | 14  |
| 51 | 421  | 400  | 420  | 1258 | 1276 | 1266 | 10  | 5   | 9   |
| 52 | 447  | 449  | 469  | 1331 | 1341 | 1318 | -5  | -5  | 0   |
| 53 | 764  | 788  | 791  | 1257 | 1260 | 1256 | 3   | 10  | 11  |
| 54 | 955  | 1009 | 971  | 1128 | 1108 | 1116 | 36  | 80  | 51  |
| 55 | 432  | 416  | 430  | 1511 | 1516 | 1517 | -3  | -6  | -4  |
| 56 | 609  | 607  | 634  | 1445 | 1446 | 1428 | -10 | -11 | 0   |
| 57 | 426  | 419  | 453  | 1074 | 1136 | 1110 | 10  | 4   | 16  |
| 58 | 490  | 489  | 518  | 1268 | 1267 | 1255 | 12  | 12  | 22  |
| 59 | 550  | 582  | 585  | 1279 | 1275 | 1262 | -24 | -13 | -11 |
| 60 | 410  | 400  | 433  | 1378 | 1387 | 1365 | -5  | -7  | 0   |
| 61 | 598  | 619  | 637  | 1266 | 1264 | 1249 | -18 | -9  | 0   |
| 62 | 465  | 467  | 459  | 1297 | 1292 | 1304 | -16 | -15 | -20 |
| 63 | 392  | 377  | 398  | 1491 | 1500 | 1487 | -3  | -5  | -1  |
| 64 | 578  | 586  | 608  | 977  | 1016 | 1003 | 16  | 15  | 19  |
| 65 | 456  | 451  | 473  | 1386 | 1388 | 1373 | 5   | 4   | 9   |
| 66 | 576  | 606  | 601  | 940  | 973  | 963  | 35  | 43  | 42  |
| 67 | 589  | 597  | 583  | 1458 | 1455 | 1464 | 23  | 26  | 20  |
| 68 | 557  | 547  | 563  | 1444 | 1445 | 1444 | -14 | -19 | -11 |
| 69 | 464  | 463  | 479  | 1344 | 1343 | 1335 | 3   | 3   | 7   |

|     |     |     |     |      |      |      |     |     |     |
|-----|-----|-----|-----|------|------|------|-----|-----|-----|
| 70  | 503 | 512 | 533 | 1237 | 1235 | 1223 | 3   | 6   | 12  |
| 71  | 796 | 810 | 826 | 1434 | 1430 | 1417 | 44  | 51  | 60  |
| 72  | 469 | 466 | 493 | 1283 | 1292 | 1270 | 3   | 2   | 9   |
| 73  | 434 | 426 | 449 | 798  | 814  | 813  | 10  | 6   | 13  |
| 74  | 431 | 424 | 435 | 1457 | 1458 | 1455 | -3  | -4  | -2  |
| 75  | 781 | 762 | 772 | 1326 | 1324 | 1333 | 71  | 66  | 69  |
| 76  | 517 | 515 | 511 | 1325 | 1322 | 1333 | 2   | 2   | 1   |
| 77  | 495 | 498 | 487 | 1368 | 1365 | 1376 | 5   | 6   | 1   |
| 78  | 623 | 650 | 633 | 1465 | 1458 | 1463 | -17 | -7  | -14 |
| 79  | 666 | 655 | 659 | 1310 | 1308 | 1318 | 44  | 41  | 41  |
| 80  | 487 | 500 | 515 | 1297 | 1301 | 1282 | -3  | 0   | 5   |
| 81  | 796 | 810 | 826 | 1434 | 1430 | 1417 | 35  | 42  | 50  |
| 82  | 552 | 553 | 569 | 1465 | 1465 | 1456 | -18 | -18 | -13 |
| 83  | 551 | 555 | 570 | 1488 | 1489 | 1478 | -19 | -17 | -12 |
| 84  | 496 | 508 | 524 | 1287 | 1291 | 1273 | -1  | 2   | 7   |
| 85  | 503 | 512 | 533 | 1237 | 1235 | 1223 | 14  | 16  | 23  |
| 86  | 419 | 409 | 396 | 738  | 742  | 749  | 8   | 5   | 1   |
| 87  | 608 | 604 | 636 | 1456 | 1457 | 1438 | -16 | -17 | -8  |
| 88  | 632 | 610 | 627 | 1411 | 1412 | 1417 | 15  | 11  | 14  |
| 89  | 438 | 436 | 458 | 1391 | 1397 | 1379 | 0   | -1  | 4   |
| 90  | 503 | 490 | 500 | 1456 | 1455 | 1461 | 3   | 2   | 3   |
| 91  | 830 | 805 | 853 | 1618 | 1629 | 1603 | -13 | -28 | 2   |
| 92  | 458 | 444 | 448 | 1495 | 1499 | 1511 | -21 | -25 | -25 |
| 93  | 308 | 298 | 304 | 1642 | 1648 | 1662 | -3  | -4  | -3  |
| 94  | 779 | 748 | 788 | 1370 | 1372 | 1364 | 23  | 6   | 29  |
| 95  | 429 | 402 | 423 | 1560 | 1571 | 1571 | 6   | 0   | 4   |
| 96  | 477 | 465 | 469 | 1484 | 1485 | 1496 | -22 | -25 | -25 |
| 97  | 535 | 531 | 503 | 1316 | 1311 | 1334 | -22 | -23 | -39 |
| 98  | 429 | 416 | 411 | 1697 | 1709 | 1731 | -10 | -15 | -17 |
| 99  | 585 | 580 | 611 | 1474 | 1478 | 1461 | -26 | -29 | -15 |
| 100 | 483 | 476 | 457 | 1450 | 1446 | 1472 | -12 | -13 | -18 |
| 101 | 553 | 549 | 547 | 1593 | 1603 | 1599 | -22 | -23 | -23 |
| 102 | 579 | 577 | 554 | 1205 | 1198 | 1214 | -28 | -28 | -44 |
| 103 | 478 | 468 | 446 | 1430 | 1426 | 1456 | -2  | -3  | -6  |
| 104 | 559 | 545 | 546 | 688  | 695  | 702  | 20  | 18  | 18  |
| 105 | 428 | 418 | 410 | 1604 | 1608 | 1629 | -24 | -27 | -30 |
| 106 | 440 | 426 | 424 | 1660 | 1671 | 1690 | -10 | -14 | -16 |
| 107 | 554 | 538 | 540 | 1542 | 1550 | 1546 | -25 | -29 | -28 |
| 108 | 577 | 567 | 572 | 1559 | 1567 | 1561 | -35 | -38 | -36 |
| 109 | 518 | 511 | 496 | 1383 | 1375 | 1398 | -6  | -6  | -9  |
| 110 | 430 | 426 | 408 | 1238 | 1235 | 1254 | 20  | 18  | 9   |
| 111 | 628 | 625 | 660 | 1405 | 1408 | 1384 | -22 | -23 | -10 |
| 112 | 485 | 487 | 470 | 1579 | 1576 | 1593 | -17 | -17 | -21 |
| 113 | 506 | 501 | 491 | 1559 | 1557 | 1572 | -20 | -21 | -24 |
| 114 | 383 | 374 | 351 | 1433 | 1430 | 1465 | -7  | -8  | -11 |
| 115 | 500 | 488 | 493 | 1516 | 1519 | 1520 | -23 | -25 | -24 |
| 116 | 374 | 371 | 347 | 1609 | 1610 | 1640 | -7  | -7  | -11 |
| 117 | 422 | 410 | 402 | 1723 | 1735 | 1759 | -2  | -5  | -8  |
| 118 | 506 | 501 | 491 | 1155 | 1239 | 1209 | 5   | -1  | -2  |
| 119 | 442 | 429 | 430 | 1638 | 1646 | 1663 | -6  | -10 | -10 |



|     |      |      |      |      |      |      |      |      |      |
|-----|------|------|------|------|------|------|------|------|------|
| 120 | 520  | 516  | 494  | 1280 | 1277 | 1297 | 16   | 14   | 2    |
| 121 | 548  | 540  | 534  | 1572 | 1575 | 1581 | -15  | -16  | -18  |
| 122 | 391  | 389  | 373  | 1176 | 1259 | 1229 | 7    | 2    | -2   |
| 123 | 871  | 858  | 895  | 1680 | 1690 | 1660 | 23   | 17   | 34   |
| 124 | 871  | 858  | 895  | 1178 | 1259 | 1229 | 73   | 60   | 77   |
| 125 | 646  | 633  | 674  | 1497 | 1507 | 1482 | -73  | -81  | -58  |
| 126 | 414  | 405  | 383  | 1432 | 1429 | 1462 | -4   | -5   | -7   |
| 127 | 714  | 690  | 729  | 1396 | 1401 | 1387 | -18  | -29  | -10  |
| 128 | 608  | 604  | 638  | 1468 | 1472 | 1452 | -21  | -22  | -11  |
| 129 | 526  | 523  | 516  | 1511 | 1510 | 1523 | -20  | -21  | -24  |
| 130 | 382  | 372  | 350  | 1550 | 1551 | 1584 | -1   | -2   | -4   |
| 131 | 564  | 562  | 536  | 1271 | 1265 | 1283 | -50  | -50  | -68  |
| 132 | 445  | 439  | 416  | 1240 | 1235 | 1259 | 70   | 66   | 49   |
| 133 | 423  | 418  | 398  | 1322 | 1318 | 1343 | 13   | 12   | 0    |
| 134 | 548  | 541  | 539  | 1572 | 1579 | 1579 | -17  | -19  | -19  |
| 135 | 541  | 537  | 528  | 1366 | 1357 | 1375 | -12  | -13  | -17  |
| 136 | 496  | 486  | 503  | 1505 | 1509 | 1504 | -18  | -20  | -17  |
| 137 | 438  | 432  | 417  | 1599 | 1602 | 1622 | -7   | -7   | -9   |
| 138 | 390  | 381  | 365  | 1708 | 1718 | 1746 | -1   | -6   | -14  |
| 139 | 364  | 364  | 359  | 1222 | 1225 | 1220 | 4    | 4    | 3    |
| 140 | 1553 | 1486 | 364  | 804  | 818  | 863  | 182  | 125  | 37   |
| 141 | 1699 | 1648 | 166  | 806  | 818  | 843  | 122  | 75   | -24  |
| 142 | 559  | 556  | 166  | 1222 | 1213 | 801  | -27  | -29  | -23  |
| 143 | 1450 | 1406 | 229  | 785  | 796  | 1072 | 163  | 124  | -27  |
| 144 | 629  | 627  | 250  | 1288 | 1279 | 1164 | -35  | -35  | 25   |
| 145 | 749  | 738  | 220  | 1229 | 1224 | 764  | -60  | -68  | -74  |
| 146 | 1209 | 1150 | 266  | 1197 | 1196 | 777  | -108 | -154 | -42  |
| 147 | 1250 | 1196 | 118  | 1229 | 1228 | 788  | -81  | -123 | -52  |
| 148 | 657  | 655  | 220  | 1337 | 1330 | 1107 | -88  | -88  | -45  |
| 149 | 697  | 672  | 235  | 1375 | 1377 | 1176 | -55  | -69  | 40   |
| 150 | 937  | 898  | 132  | 1191 | 1179 | 1185 | -179 | -205 | 12   |
| 151 | 588  | 582  | 1566 | 1318 | 1307 | 819  | -22  | -23  | 187  |
| 152 | 1515 | 1455 | 1733 | 1293 | 1300 | 820  | -138 | -190 | 145  |
| 153 | 1208 | 1133 | 547  | 1180 | 1171 | 1225 | -90  | -147 | -36  |
| 154 | 768  | 793  | 1422 | 1505 | 1482 | 799  | -77  | -63  | 136  |
| 155 | 1595 | 1557 | 629  | 1274 | 1277 | 1288 | -40  | -74  | -35  |
| 156 | 1639 | 1589 | 757  | 1299 | 1305 | 1228 | -64  | -108 | -54  |
| 157 | 1825 | 1784 | 1173 | 1340 | 1345 | 1204 | -33  | -70  | -139 |
| 158 | 679  | 653  | 1230 | 1284 | 1282 | 1236 | -109 | -125 | -100 |
| 159 | 915  | 892  | 660  | 1492 | 1508 | 1338 | -60  | -75  | -86  |
| 160 | 1503 | 1456 | 705  | 1329 | 1326 | 1370 | -117 | -154 | -50  |
| 161 | 1524 | 1486 | 916  | 1421 | 1418 | 1189 | -208 | -238 | -195 |
| 162 | 593  | 592  | 580  | 1254 | 1246 | 1319 | -69  | -69  | -25  |
| 163 | 796  | 773  | 1518 | 1218 | 1203 | 1300 | -120 | -134 | -139 |
| 164 | 1632 | 1572 | 1169 | 1312 | 1319 | 1183 | -55  | -108 | -123 |
| 165 | 782  | 776  | 760  | 1278 | 1261 | 1494 | -125 | -126 | -78  |
| 166 | 820  | 817  | 1605 | 1311 | 1290 | 1280 | -155 | -152 | -33  |
| 167 | 1129 | 1092 | 1665 | 1222 | 1212 | 1302 | -83  | -109 | -43  |
| 168 | 709  | 703  | 1865 | 1263 | 1257 | 1344 | 3    | -1   | -1   |
| 169 | 1439 | 1385 | 688  | 879  | 878  | 1278 | 217  | 169  | -102 |

|     |      |      |      |      |      |      |      |      |      |
|-----|------|------|------|------|------|------|------|------|------|
| 170 | 1577 | 1525 | 924  | 863  | 860  | 1486 | 69   | 30   | -54  |
| 171 | 1430 | 1347 | 1503 | 1199 | 1204 | 1330 | -84  | -161 | -118 |
| 172 | 1362 | 1269 | 1528 | 841  | 837  | 1423 | 15   | -69  | -206 |
| 173 | 1265 | 1223 | 576  | 1236 | 1232 | 1256 | -235 | -269 | -81  |
| 174 | 1355 | 1283 | 779  | 1209 | 1212 | 1209 | -135 | -198 | -131 |
| 175 | 1544 | 1512 | 1644 | 827  | 823  | 1316 | 86   | 62   | -46  |
| 176 | 1294 | 1224 | 769  | 1207 | 1207 | 1272 | -85  | -146 | -132 |
| 177 | 1873 | 1826 | 811  | 1330 | 1336 | 1300 | 17   | -24  | -160 |
| 178 | 1214 | 1160 | 1119 | 1213 | 1212 | 1218 | -131 | -174 | -90  |
| 179 | 1240 | 1164 | 695  | 1183 | 1170 | 1255 | -49  | -105 | -7   |
| 180 | 1252 | 1204 | 1396 | 1234 | 1234 | 893  | -77  | -115 | 177  |
| 181 | 989  | 951  | 1609 | 1206 | 1197 | 877  | -111 | -137 | 88   |
| 182 | 607  | 603  | 1370 | 1308 | 1297 | 1202 | -34  | -35  | -140 |
| 183 | 867  | 846  | 1296 | 1476 | 1491 | 856  | -53  | -66  | -48  |
| 184 | 566  | 564  | 1241 | 1250 | 1241 | 1233 | -81  | -81  | -254 |
| 185 | 1019 | 965  | 1300 | 1187 | 1177 | 1211 | -187 | -225 | -183 |
| 186 | 998  | 981  | 1535 | 1405 | 1381 | 844  | -336 | -337 | 72   |
| 187 | 854  | 834  | 1250 | 1217 | 1212 | 1214 | -36  | -50  | -125 |
| 188 | 1550 | 1499 | 1919 | 1280 | 1282 | 1335 | -60  | -102 | 53   |
| 189 | 1197 | 1124 | 1181 | 815  | 823  | 1220 | 66   | 5    | -161 |
| 190 | 940  | 928  | 1208 | 792  | 801  | 1184 | -165 | -176 | -76  |
| 191 | 2032 | 1993 | 1239 | 1294 | 1297 | 1241 | 267  | 234  | -89  |
| 192 | 1090 | 1045 | 971  | 1307 | 1314 | 1206 | -123 | -161 | -124 |
| 193 | 835  | 823  | 603  | 801  | 815  | 1308 | 59   | 48   | -36  |
| 194 | 1537 | 1503 | 877  | 1369 | 1367 | 1471 | -129 | -156 | -47  |
| 195 | 1167 | 1147 | 556  | 1485 | 1490 | 1249 | -27  | -39  | -88  |
| 196 | 706  | 702  | 988  | 1284 | 1277 | 1189 | -27  | -28  | -211 |
| 197 | 1237 | 1194 | 995  | 1226 | 1227 | 1400 | -108 | -142 | -336 |
| 198 | 953  | 932  | 858  | 1316 | 1300 | 1214 | -112 | -125 | -33  |
| 199 | 615  | 614  | 1546 | 1231 | 1219 | 1286 | -65  | -64  | -66  |
| 200 | 1609 | 1515 | 1170 | 1238 | 1245 | 848  | -10  | -92  | 33   |
| 201 | 1117 | 1069 | 953  | 1211 | 1204 | 824  | -68  | -103 | -161 |
| 202 | 1105 | 1063 | 2076 | 1225 | 1219 | 1298 | 7    | -22  | 301  |
| 203 | 1505 | 1465 | 1037 | 1376 | 1372 | 1311 | -154 | -185 | -166 |
| 204 | 798  | 790  | 837  | 1265 | 1253 | 831  | -15  | -19  | 55   |
| 205 | 1582 | 1529 | 1546 | 1277 | 1281 | 1370 | -47  | -92  | -122 |
| 206 | 1604 | 1577 | 1184 | 772  | 792  | 1474 | 138  | 107  | -15  |
| 207 | 1484 | 1437 | 709  | 1256 | 1260 | 1284 | -99  | -140 | -25  |
| 208 | 1241 | 1168 | 1226 | 1190 | 1179 | 1234 | -67  | -121 | -119 |
| 209 | 1544 | 1512 | 939  | 1214 | 1216 | 1316 | -47  | -74  | -124 |
| 210 | 1575 | 1531 | 613  | 1402 | 1411 | 1226 | 41   | 6    | -65  |
| 211 | 1101 | 1058 | 1574 | 1212 | 1205 | 1250 | -73  | -106 | -44  |
| 212 | 713  | 707  | 1098 | 1283 | 1274 | 1214 | -31  | -33  | -84  |
| 213 | 630  | 628  | 1094 | 1237 | 1224 | 1220 | -74  | -73  | 1    |
| 214 | 1347 | 1294 | 1505 | 1232 | 1233 | 1376 | -128 | -172 | -154 |
| 215 | 853  | 824  | 798  | 1252 | 1248 | 1261 | -56  | -76  | -15  |
| 216 | 1564 | 1530 | 1581 | 1365 | 1363 | 1284 | -116 | -143 | -50  |
| 217 | 1489 | 1475 | 1629 | 1326 | 1324 | 789  | -22  | -32  | 151  |
| 218 | 1406 | 1322 | 1480 | 1222 | 1225 | 1265 | -78  | -154 | -106 |
| 219 | 885  | 850  | 1215 | 736  | 743  | 1192 | 14   | -19  | -88  |

|     |      |      |      |      |      |      |      |      |      |
|-----|------|------|------|------|------|------|------|------|------|
| 220 | 1511 | 1446 | 1546 | 1285 | 1291 | 1222 | -90  | -146 | -49  |
| 221 | 1643 | 1651 | 1581 | 1406 | 1406 | 1405 | 17   | 23   | 44   |
| 222 | 1396 | 1387 | 1087 | 1332 | 1331 | 1214 | -155 | -161 | -86  |
| 223 | 1642 | 1621 | 713  | 1321 | 1324 | 1282 | 39   | 20   | -30  |
| 224 | 1333 | 1332 | 630  | 1388 | 1385 | 1231 | -194 | -194 | -73  |
| 225 | 1605 | 1614 | 1326 | 1413 | 1402 | 1240 | -1   | 9    | -148 |
| 226 | 1829 | 1807 | 853  | 1344 | 1340 | 1247 | -7   | -24  | -55  |
| 227 | 1564 | 1539 | 1570 | 1317 | 1319 | 1366 | -93  | -114 | -112 |
| 228 | 1525 | 1512 | 1507 | 1332 | 1334 | 1326 | -102 | -113 | -9   |
| 229 | 1735 | 1723 | 1357 | 1363 | 1358 | 1231 | -42  | -50  | -125 |
| 230 | 1982 | 2000 | 862  | 1399 | 1402 | 744  | 278  | 292  | -7   |
| 231 | 1411 | 1428 | 1517 | 1551 | 1536 | 1288 | -65  | -49  | -86  |
| 232 | 1769 | 1732 | 1615 | 1268 | 1270 | 1406 | 42   | 10   | -6   |
| 233 | 1982 | 2000 | 1402 | 1399 | 1402 | 1333 | 363  | 379  | -151 |
| 234 | 1055 | 1076 | 1620 | 1353 | 1359 | 1320 | -140 | -127 | 19   |
| 235 | 1791 | 1766 | 1331 | 1525 | 1532 | 1387 | 38   | 14   | -196 |
| 236 | 1897 | 1849 | 1624 | 1454 | 1451 | 1404 | -27  | -66  | 17   |
| 237 | 916  | 947  | 1830 | 1426 | 1412 | 1340 | -75  | -55  | -4   |
| 238 | 1517 | 1489 | 1553 | 1285 | 1287 | 1318 | -90  | -114 | -102 |
| 239 | 1824 | 1788 | 1512 | 1550 | 1556 | 1335 | -133 | -166 | -113 |
| 240 | 1659 | 1665 | 1738 | 1710 | 1720 | 1358 | -201 | -202 | -38  |
| 241 | 1469 | 1477 | 1920 | 1514 | 1525 | 1401 | -192 | -190 | 227  |
| 242 | 1845 | 1794 | 1429 | 1325 | 1329 | 1536 | 86   | 41   | -48  |
| 243 | 1527 | 1496 | 1771 | 1275 | 1277 | 1268 | -57  | -85  | 44   |
| 244 | 996  | 1026 | 1920 | 1397 | 1390 | 1401 | -51  | -31  | 306  |
| 245 | 1963 | 1919 | 1046 | 762  | 780  | 1365 | 374  | 332  | -150 |
| 246 | 1793 | 1770 | 1747 | 784  | 801  | 1539 | 36   | 12   | -4   |
| 247 | 1824 | 1794 | 1888 | 786  | 803  | 1458 | 276  | 244  | -36  |
| 248 | 1709 | 1699 | 875  | 1572 | 1581 | 1435 | -140 | -152 | -99  |
| 249 | 1630 | 1605 | 1512 | 1480 | 1474 | 1293 | -134 | -152 | -97  |
| 250 | 1698 | 1715 | 1782 | 1587 | 1597 | 1564 | -253 | -246 | -174 |
| 251 | 1925 | 1957 | 1604 | 1610 | 1616 | 1735 | 39   | 63   | -255 |
| 252 | 1256 | 1242 | 1404 | 1341 | 1337 | 1538 | -81  | -89  | -254 |
| 253 | 1764 | 1697 | 1853 | 1323 | 1323 | 1330 | 68   | 8    | 91   |
| 254 | 1784 | 1747 | 1523 | 1510 | 1506 | 1283 | -81  | -109 | -64  |
| 255 | 1205 | 1231 | 965  | 1350 | 1359 | 1407 | -116 | -102 | -73  |
| 256 | 1635 | 1600 | 1973 | 1509 | 1516 | 776  | -225 | -260 | 382  |
| 257 | 1469 | 1438 | 1791 | 1257 | 1258 | 798  | 5    | -23  | 31   |
| 258 | 1522 | 1491 | 1779 | 1591 | 1585 | 801  | -197 | -224 | 233  |
| 259 | 1741 | 1741 | 1663 | 1376 | 1367 | 1590 | -44  | -41  | -185 |
| 260 | 975  | 1014 | 1649 | 1347 | 1349 | 1480 | -75  | -54  | -119 |
| 261 | 1274 | 1328 | 1632 | 1290 | 1280 | 1614 | -17  | 27   | -326 |
| 262 | 1053 | 1080 | 1889 | 1142 | 1129 | 1629 | 42   | 63   | 3    |
| 263 | 1157 | 1195 | 1251 | 1275 | 1266 | 1346 | -57  | -29  | -86  |
| 264 | 1439 | 1469 | 1766 | 1206 | 1200 | 1327 | 153  | 180  | 69   |
| 265 | 531  | 524  | 1785 | 1133 | 1129 | 1514 | 18   | 13   | -81  |
| 266 | 420  | 430  | 1185 | 1283 | 1291 | 1365 | -43  | -35  | -136 |
| 267 | 1592 | 1647 | 1612 | 1458 | 1444 | 1528 | -4   | 43   | -259 |
| 268 | 1365 | 1418 | 1468 | 1429 | 1414 | 1264 | -41  | 2    | 4    |
| 269 | 1284 | 1324 | 1529 | 1424 | 1410 | 1595 | -1   | 33   | -192 |

|     |      |      |      |      |      |      |      |      |      |
|-----|------|------|------|------|------|------|------|------|------|
| 270 | 661  | 670  | 1751 | 1193 | 1189 | 1369 | -24  | -18  | -34  |
| 271 | 582  | 589  | 944  | 1190 | 1193 | 1360 | -44  | -38  | -96  |
| 272 | 552  | 555  | 1306 | 1180 | 1177 | 1280 | 0    | 3    | 11   |
| 273 | 1260 | 1319 | 1061 | 884  | 877  | 1129 | 51   | 97   | 50   |
| 274 | 1050 | 1082 | 1198 | 1435 | 1421 | 1262 | -133 | -112 | -26  |
| 275 | 397  | 389  | 1488 | 836  | 836  | 1195 | 50   | 47   | 198  |
| 276 | 179  | 177  | 527  | 816  | 817  | 1124 | -17  | -18  | 16   |
| 277 | 174  | 169  | 430  | 775  | 777  | 1279 | -19  | -21  | -35  |
| 278 | 239  | 232  | 1569 | 1061 | 1064 | 1461 | -20  | -25  | -22  |
| 279 | 259  | 250  | 1361 | 1155 | 1157 | 1425 | 31   | 26   | -43  |
| 280 | 241  | 237  | 1261 | 739  | 743  | 1422 | -55  | -59  | -18  |
| 281 | 288  | 283  | 669  | 751  | 755  | 1184 | -22  | -26  | -18  |
| 282 | 122  | 118  | 592  | 762  | 767  | 1183 | -48  | -51  | -35  |
| 283 | 231  | 225  | 557  | 1094 | 1096 | 1171 | -37  | -41  | 5    |
| 284 | 243  | 234  | 1260 | 1168 | 1170 | 902  | 45   | 39   | 42   |
| 285 | 137  | 131  | 1020 | 1178 | 1180 | 1435 | 14   | 11   | -148 |
| 286 | 365  | 355  | 342  | 1118 | 1130 | 1152 | -117 | -125 | -137 |
| 287 | 177  | 168  | 166  | 1338 | 1341 | 1351 | 1    | -2   | -4   |
| 288 | 235  | 225  | 221  | 1162 | 1176 | 1186 | -178 | -186 | -189 |
| 289 | 217  | 208  | 203  | 1191 | 1206 | 1221 | -99  | -105 | -110 |

*IPSL-CM5A-LR*

|    |     |     |     |      |      |      |     |     |     |
|----|-----|-----|-----|------|------|------|-----|-----|-----|
| 1  | 572 | 590 | 599 | 1086 | 1085 | 1101 | 15  | 19  | 20  |
| 2  | 647 | 657 | 671 | 944  | 938  | 955  | 48  | 55  | 61  |
| 3  | 619 | 623 | 624 | 702  | 703  | 707  | 71  | 72  | 73  |
| 4  | 664 | 667 | 670 | 941  | 940  | 954  | 59  | 61  | 61  |
| 5  | 485 | 504 | 528 | 784  | 781  | 790  | 23  | 35  | 49  |
| 6  | 595 | 593 | 576 | 961  | 962  | 980  | 26  | 25  | 14  |
| 7  | 753 | 744 | 717 | 977  | 978  | 996  | 127 | 120 | 97  |
| 8  | 546 | 578 | 592 | 972  | 970  | 986  | 44  | 61  | 67  |
| 9  | 559 | 563 | 549 | 966  | 970  | 984  | 11  | 12  | 5   |
| 10 | 742 | 724 | 744 | 704  | 707  | 714  | 86  | 80  | 85  |
| 11 | 562 | 559 | 540 | 973  | 974  | 992  | 1   | -1  | -12 |
| 12 | 623 | 635 | 649 | 939  | 933  | 949  | 35  | 42  | 48  |
| 13 | 617 | 612 | 589 | 988  | 989  | 1006 | -27 | -29 | -44 |
| 14 | 592 | 611 | 626 | 999  | 994  | 1010 | 34  | 45  | 50  |
| 15 | 471 | 493 | 524 | 812  | 804  | 815  | 10  | 27  | 48  |
| 16 | 571 | 591 | 602 | 1031 | 1028 | 1043 | 22  | 29  | 31  |
| 17 | 552 | 549 | 530 | 688  | 691  | 704  | 27  | 25  | 12  |
| 18 | 488 | 499 | 504 | 1106 | 1106 | 1128 | 20  | 24  | 25  |
| 19 | 608 | 619 | 598 | 1335 | 1336 | 1360 | -7  | -4  | -11 |
| 20 | 703 | 708 | 682 | 1235 | 1238 | 1259 | 5   | 6   | -6  |
| 21 | 575 | 571 | 550 | 973  | 974  | 991  | -8  | -11 | -26 |
| 22 | 582 | 581 | 577 | 979  | 984  | 998  | 18  | 17  | 14  |
| 23 | 465 | 457 | 455 | 1171 | 1166 | 1201 | 12  | 10  | 9   |
| 24 | 844 | 848 | 806 | 1171 | 1174 | 1193 | 2   | 3   | -24 |
| 25 | 457 | 476 | 501 | 788  | 784  | 792  | 7   | 18  | 31  |
| 26 | 660 | 669 | 643 | 1289 | 1292 | 1314 | 20  | 24  | 10  |
| 27 | 615 | 629 | 644 | 948  | 942  | 958  | 43  | 52  | 58  |

|    |      |      |      |      |      |      |     |     |     |
|----|------|------|------|------|------|------|-----|-----|-----|
| 28 | 556  | 555  | 541  | 989  | 991  | 1008 | 3   | 2   | -6  |
| 29 | 502  | 525  | 548  | 888  | 881  | 896  | 7   | 21  | 32  |
| 30 | 683  | 683  | 671  | 1117 | 1122 | 1137 | 33  | 32  | 24  |
| 31 | 518  | 547  | 574  | 897  | 893  | 906  | 15  | 33  | 49  |
| 32 | 533  | 564  | 588  | 931  | 928  | 942  | 33  | 52  | 65  |
| 33 | 623  | 633  | 645  | 1037 | 1036 | 1050 | 35  | 39  | 43  |
| 34 | 490  | 511  | 537  | 814  | 808  | 819  | 17  | 32  | 47  |
| 35 | 617  | 615  | 599  | 998  | 1000 | 1016 | 6   | 5   | -7  |
| 36 | 458  | 471  | 497  | 968  | 960  | 980  | 17  | 23  | 31  |
| 37 | 808  | 823  | 769  | 820  | 821  | 828  | 78  | 85  | 58  |
| 38 | 1031 | 1063 | 979  | 1197 | 1201 | 1215 | 77  | 101 | 33  |
| 39 | 762  | 773  | 728  | 1563 | 1564 | 1583 | 6   | 11  | -14 |
| 40 | 1154 | 1184 | 1092 | 1157 | 1160 | 1173 | 158 | 182 | 105 |
| 41 | 785  | 799  | 748  | 853  | 852  | 860  | 78  | 86  | 55  |
| 42 | 679  | 690  | 657  | 1283 | 1287 | 1308 | -52 | -48 | -66 |
| 43 | 582  | 595  | 554  | 840  | 840  | 848  | 33  | 36  | 28  |
| 44 | 725  | 717  | 692  | 1384 | 1387 | 1408 | 50  | 46  | 31  |
| 45 | 611  | 609  | 581  | 1316 | 1318 | 1342 | 23  | 22  | 9   |
| 46 | 871  | 875  | 826  | 1105 | 1106 | 1123 | 4   | 7   | -33 |
| 47 | 951  | 977  | 904  | 1274 | 1279 | 1293 | 72  | 91  | 35  |
| 48 | 557  | 568  | 530  | 1372 | 1374 | 1406 | 14  | 16  | 7   |
| 49 | 437  | 434  | 424  | 1345 | 1337 | 1379 | 4   | 3   | 0   |
| 50 | 500  | 499  | 471  | 1281 | 1282 | 1315 | 14  | 13  | 5   |
| 51 | 431  | 420  | 414  | 1197 | 1193 | 1223 | 14  | 12  | 9   |
| 52 | 473  | 464  | 453  | 1273 | 1272 | 1298 | 3   | 1   | -2  |
| 53 | 740  | 751  | 713  | 1272 | 1275 | 1297 | -5  | -2  | -15 |
| 54 | 936  | 950  | 885  | 1098 | 1098 | 1114 | 28  | 39  | -12 |
| 55 | 452  | 428  | 433  | 1441 | 1452 | 1468 | 3   | -2  | -1  |
| 56 | 636  | 624  | 609  | 1466 | 1470 | 1475 | -3  | -7  | -12 |
| 57 | 450  | 438  | 440  | 1104 | 1096 | 1120 | 16  | 12  | 11  |
| 58 | 538  | 512  | 533  | 1222 | 1224 | 1236 | 30  | 22  | 28  |
| 59 | 606  | 590  | 586  | 1239 | 1239 | 1257 | -2  | -7  | -10 |
| 60 | 427  | 417  | 415  | 1267 | 1267 | 1289 | 3   | 1   | 0   |
| 61 | 643  | 630  | 619  | 1228 | 1228 | 1247 | 5   | 0   | -7  |
| 62 | 482  | 456  | 469  | 1312 | 1320 | 1326 | -9  | -22 | -16 |
| 63 | 421  | 399  | 410  | 1413 | 1423 | 1440 | 4   | 0   | 2   |
| 64 | 610  | 603  | 583  | 1020 | 1010 | 1036 | 19  | 18  | 13  |
| 65 | 492  | 467  | 480  | 1333 | 1338 | 1352 | 14  | 9   | 11  |
| 66 | 633  | 611  | 618  | 992  | 983  | 1007 | 51  | 44  | 45  |
| 67 | 636  | 602  | 630  | 1464 | 1473 | 1479 | 43  | 27  | 39  |
| 68 | 585  | 560  | 554  | 1450 | 1456 | 1460 | -1  | -13 | -17 |
| 69 | 503  | 477  | 496  | 1305 | 1308 | 1320 | 14  | 8   | 12  |
| 70 | 554  | 531  | 547  | 1193 | 1194 | 1207 | 20  | 14  | 17  |
| 71 | 827  | 811  | 795  | 1383 | 1385 | 1403 | 64  | 57  | 47  |
| 72 | 492  | 482  | 474  | 1216 | 1215 | 1238 | 11  | 9   | 6   |
| 73 | 469  | 446  | 459  | 838  | 836  | 848  | 17  | 11  | 14  |
| 74 | 462  | 439  | 453  | 1410 | 1418 | 1433 | 4   | 0   | 2   |
| 75 | 799  | 758  | 762  | 1329 | 1335 | 1341 | 76  | 65  | 65  |
| 76 | 534  | 505  | 516  | 1345 | 1353 | 1358 | 6   | -2  | 0   |
| 77 | 518  | 489  | 506  | 1395 | 1404 | 1409 | 12  | 0   | 7   |

|     |     |     |     |      |      |      |      |      |      |
|-----|-----|-----|-----|------|------|------|------|------|------|
| 78  | 676 | 648 | 663 | 1457 | 1464 | 1473 | 3    | -8   | -3   |
| 79  | 684 | 648 | 656 | 1328 | 1335 | 1340 | 48   | 37   | 39   |
| 80  | 524 | 510 | 507 | 1240 | 1240 | 1260 | 10   | 6    | 4    |
| 81  | 827 | 811 | 795 | 1383 | 1385 | 1403 | 55   | 48   | 39   |
| 82  | 594 | 574 | 563 | 1485 | 1491 | 1495 | -8   | -14  | -17  |
| 83  | 595 | 575 | 564 | 1521 | 1528 | 1532 | -7   | -14  | -18  |
| 84  | 535 | 521 | 518 | 1232 | 1232 | 1252 | 12   | 9    | 7    |
| 85  | 554 | 531 | 547 | 1193 | 1194 | 1207 | 31   | 24   | 28   |
| 86  | 433 | 407 | 391 | 740  | 744  | 748  | 13   | 4    | -1   |
| 87  | 619 | 610 | 599 | 1481 | 1484 | 1489 | -15  | -17  | -20  |
| 88  | 648 | 616 | 614 | 1403 | 1409 | 1415 | 19   | 12   | 11   |
| 89  | 471 | 453 | 459 | 1317 | 1321 | 1339 | 10   | 6    | 6    |
| 90  | 517 | 490 | 494 | 1418 | 1426 | 1438 | 6    | 3    | 3    |
| 91  | 841 | 856 | 823 | 1587 | 1588 | 1592 | -3   | 5    | -13  |
| 92  | 465 | 446 | 438 | 1477 | 1483 | 1490 | -18  | -23  | -26  |
| 93  | 329 | 311 | 309 | 1559 | 1573 | 1593 | 1    | -1   | -2   |
| 94  | 730 | 749 | 739 | 1453 | 1452 | 1458 | -15  | -5   | -10  |
| 95  | 446 | 419 | 423 | 1466 | 1478 | 1496 | 12   | 6    | 7    |
| 96  | 486 | 469 | 461 | 1469 | 1475 | 1481 | -19  | -24  | -26  |
| 97  | 575 | 568 | 572 | 1324 | 1325 | 1339 | -3   | -6   | -6   |
| 98  | 444 | 419 | 408 | 1673 | 1687 | 1700 | -4   | -13  | -17  |
| 99  | 576 | 569 | 564 | 1508 | 1509 | 1515 | -34  | -36  | -39  |
| 100 | 497 | 477 | 482 | 1472 | 1476 | 1487 | -10  | -14  | -14  |
| 101 | 542 | 532 | 534 | 1625 | 1630 | 1632 | -25  | -27  | -27  |
| 102 | 638 | 634 | 639 | 1177 | 1178 | 1191 | 9    | 7    | 8    |
| 103 | 493 | 471 | 477 | 1455 | 1460 | 1471 | -1   | -3   | -3   |
| 104 | 544 | 535 | 535 | 736  | 733  | 761  | 16   | 15   | 14   |
| 105 | 432 | 413 | 402 | 1593 | 1603 | 1610 | -22  | -28  | -31  |
| 106 | 452 | 428 | 418 | 1633 | 1644 | 1655 | -5   | -13  | -16  |
| 107 | 538 | 530 | 529 | 1572 | 1576 | 1579 | -30  | -32  | -32  |
| 108 | 565 | 565 | 566 | 1614 | 1615 | 1619 | -42  | -42  | -42  |
| 109 | 541 | 517 | 531 | 1411 | 1415 | 1426 | -3   | -7   | -6   |
| 110 | 441 | 444 | 441 | 1231 | 1234 | 1249 | 25   | 26   | 24   |
| 111 | 620 | 616 | 609 | 1450 | 1451 | 1456 | -29  | -30  | -33  |
| 112 | 490 | 465 | 463 | 1569 | 1579 | 1581 | -16  | -22  | -22  |
| 113 | 506 | 485 | 481 | 1553 | 1561 | 1563 | -19  | -24  | -25  |
| 114 | 394 | 377 | 377 | 1458 | 1463 | 1475 | -7   | -8   | -9   |
| 115 | 493 | 481 | 478 | 1522 | 1526 | 1530 | -24  | -27  | -28  |
| 116 | 382 | 360 | 353 | 1608 | 1619 | 1625 | -6   | -9   | -10  |
| 117 | 439 | 413 | 400 | 1701 | 1716 | 1730 | 4    | -4   | -8   |
| 118 | 506 | 485 | 481 | 1163 | 1150 | 1192 | 4    | 0    | -3   |
| 119 | 457 | 432 | 426 | 1598 | 1610 | 1624 | -1   | -8   | -10  |
| 120 | 559 | 557 | 559 | 1280 | 1280 | 1296 | 34   | 33   | 33   |
| 121 | 541 | 523 | 522 | 1581 | 1588 | 1589 | -16  | -20  | -21  |
| 122 | 404 | 406 | 404 | 1190 | 1179 | 1212 | 10   | 11   | 9    |
| 123 | 907 | 917 | 883 | 1714 | 1720 | 1722 | 33   | 36   | 23   |
| 124 | 907 | 917 | 883 | 1196 | 1187 | 1216 | 85   | 90   | 74   |
| 125 | 593 | 611 | 602 | 1608 | 1611 | 1617 | -114 | -106 | -111 |
| 126 | 427 | 408 | 410 | 1457 | 1462 | 1473 | -4   | -5   | -5   |
| 127 | 665 | 683 | 674 | 1485 | 1485 | 1491 | -51  | -43  | -48  |

|     |      |      |      |      |      |      |      |      |      |
|-----|------|------|------|------|------|------|------|------|------|
| 128 | 596  | 591  | 586  | 1513 | 1514 | 1520 | -28  | -29  | -31  |
| 129 | 530  | 520  | 525  | 1539 | 1543 | 1551 | -21  | -24  | -23  |
| 130 | 388  | 371  | 364  | 1565 | 1572 | 1581 | -1   | -2   | -3   |
| 131 | 620  | 612  | 619  | 1260 | 1261 | 1274 | -14  | -18  | -16  |
| 132 | 450  | 451  | 444  | 1241 | 1245 | 1259 | 74   | 74   | 69   |
| 133 | 433  | 433  | 430  | 1333 | 1335 | 1350 | 18   | 18   | 15   |
| 134 | 539  | 529  | 530  | 1604 | 1609 | 1611 | -20  | -22  | -22  |
| 135 | 561  | 544  | 556  | 1398 | 1401 | 1412 | -8   | -14  | -11  |
| 136 | 504  | 491  | 486  | 1507 | 1511 | 1517 | -17  | -19  | -20  |
| 137 | 442  | 423  | 420  | 1608 | 1617 | 1622 | -7   | -8   | -9   |
| 138 | 397  | 374  | 357  | 1706 | 1721 | 1732 | 2    | -9   | -17  |
| 139 | 365  | 360  | 372  | 1145 | 1152 | 1157 | 7    | 5    | 8    |
| 140 | 1406 | 1461 | 380  | 845  | 845  | 853  | 54   | 97   | 43   |
| 141 | 1544 | 1594 | 168  | 842  | 843  | 827  | -20  | 22   | -22  |
| 142 | 605  | 586  | 164  | 1242 | 1244 | 781  | 4    | -10  | -24  |
| 143 | 1308 | 1368 | 225  | 816  | 819  | 1040 | 42   | 88   | -29  |
| 144 | 642  | 629  | 234  | 1343 | 1345 | 1110 | -35  | -43  | 17   |
| 145 | 737  | 734  | 227  | 1306 | 1307 | 731  | -80  | -83  | -67  |
| 146 | 1088 | 1097 | 278  | 1425 | 1418 | 740  | -301 | -291 | -30  |
| 147 | 1142 | 1152 | 105  | 1453 | 1446 | 748  | -258 | -247 | -62  |
| 148 | 661  | 654  | 224  | 1398 | 1399 | 1086 | -97  | -101 | -41  |
| 149 | 656  | 672  | 218  | 1460 | 1458 | 1115 | -90  | -81  | 30   |
| 150 | 806  | 824  | 113  | 1392 | 1389 | 1131 | -347 | -332 | 6    |
| 151 | 617  | 593  | 1440 | 1370 | 1374 | 853  | -17  | -27  | 77   |
| 152 | 1338 | 1385 | 1586 | 1545 | 1532 | 850  | -394 | -349 | 13   |
| 153 | 1103 | 1126 | 601  | 1401 | 1394 | 1254 | -259 | -237 | 0    |
| 154 | 747  | 749  | 1329 | 1491 | 1493 | 823  | -83  | -83  | 55   |
| 155 | 1403 | 1453 | 643  | 1499 | 1492 | 1354 | -268 | -222 | -36  |
| 156 | 1465 | 1518 | 742  | 1510 | 1497 | 1315 | -297 | -247 | -78  |
| 157 | 1676 | 1739 | 1049 | 1501 | 1487 | 1428 | -214 | -157 | -334 |
| 158 | 624  | 640  | 1099 | 1379 | 1378 | 1458 | -162 | -151 | -294 |
| 159 | 814  | 862  | 664  | 1643 | 1647 | 1408 | -145 | -121 | -97  |
| 160 | 1328 | 1378 | 664  | 1482 | 1474 | 1465 | -320 | -276 | -87  |
| 161 | 1400 | 1438 | 795  | 1565 | 1556 | 1402 | -373 | -339 | -359 |
| 162 | 653  | 643  | 613  | 1242 | 1243 | 1383 | -26  | -34  | -20  |
| 163 | 728  | 737  | 1361 | 1356 | 1354 | 1543 | -199 | -192 | -374 |
| 164 | 1473 | 1519 | 1097 | 1528 | 1513 | 1406 | -272 | -227 | -266 |
| 165 | 758  | 762  | 736  | 1369 | 1367 | 1504 | -159 | -156 | -90  |
| 166 | 870  | 877  | 1404 | 1336 | 1338 | 1503 | -125 | -121 | -268 |
| 167 | 1044 | 1074 | 1502 | 1402 | 1397 | 1507 | -208 | -183 | -265 |
| 168 | 755  | 760  | 1753 | 1207 | 1209 | 1498 | 44   | 47   | -149 |
| 169 | 1257 | 1319 | 631  | 885  | 883  | 1386 | 57   | 111  | -158 |
| 170 | 1429 | 1484 | 842  | 873  | 872  | 1653 | -52  | -8   | -133 |
| 171 | 1259 | 1292 | 1344 | 1369 | 1358 | 1484 | -282 | -250 | -308 |
| 172 | 1191 | 1227 | 1419 | 852  | 850  | 1567 | -144 | -110 | -359 |
| 173 | 1142 | 1190 | 653  | 1413 | 1400 | 1253 | -433 | -386 | -28  |
| 174 | 1199 | 1228 | 717  | 1384 | 1373 | 1366 | -331 | -301 | -209 |
| 175 | 1361 | 1406 | 1516 | 836  | 834  | 1525 | -67  | -29  | -235 |
| 176 | 1147 | 1157 | 741  | 1436 | 1427 | 1380 | -281 | -270 | -172 |
| 177 | 1706 | 1765 | 882  | 1483 | 1469 | 1345 | -186 | -132 | -118 |

|     |      |      |      |      |      |      |      |      |      |
|-----|------|------|------|------|------|------|------|------|------|
| 178 | 1084 | 1093 | 1062 | 1443 | 1435 | 1407 | -338 | -327 | -195 |
| 179 | 1138 | 1169 | 754  | 1407 | 1401 | 1220 | -220 | -193 | 42   |
| 180 | 1146 | 1157 | 1275 | 1455 | 1449 | 889  | -243 | -232 | 71   |
| 181 | 875  | 881  | 1479 | 1377 | 1374 | 878  | -250 | -245 | -15  |
| 182 | 635  | 612  | 1261 | 1366 | 1370 | 1372 | -29  | -40  | -281 |
| 183 | 778  | 819  | 1199 | 1623 | 1628 | 857  | -127 | -107 | -137 |
| 184 | 618  | 603  | 1151 | 1259 | 1261 | 1414 | -47  | -58  | -426 |
| 185 | 906  | 923  | 1197 | 1395 | 1390 | 1387 | -361 | -347 | -334 |
| 186 | 929  | 962  | 1379 | 1612 | 1613 | 840  | -497 | -472 | -53  |
| 187 | 817  | 817  | 1113 | 1321 | 1321 | 1438 | -83  | -83  | -311 |
| 188 | 1347 | 1410 | 1775 | 1487 | 1479 | 1480 | -309 | -254 | -129 |
| 189 | 1100 | 1133 | 1046 | 800  | 793  | 1446 | -7   | 23   | -369 |
| 190 | 849  | 912  | 1143 | 779  | 772  | 1414 | -236 | -184 | -218 |
| 191 | 1845 | 1898 | 1105 | 1418 | 1407 | 1461 | 65   | 113  | -278 |
| 192 | 985  | 1046 | 846  | 1460 | 1448 | 1386 | -248 | -196 | -275 |
| 193 | 823  | 812  | 632  | 796  | 789  | 1379 | 52   | 45   | -32  |
| 194 | 1353 | 1406 | 802  | 1577 | 1568 | 1634 | -362 | -315 | -117 |
| 195 | 1056 | 1095 | 616  | 1634 | 1624 | 1271 | -130 | -106 | -50  |
| 196 | 716  | 702  | 890  | 1357 | 1359 | 1403 | -33  | -41  | -377 |
| 197 | 1131 | 1143 | 965  | 1445 | 1438 | 1623 | -275 | -263 | -476 |
| 198 | 898  | 925  | 823  | 1570 | 1572 | 1330 | -219 | -198 | -81  |
| 199 | 658  | 641  | 1361 | 1276 | 1279 | 1489 | -41  | -53  | -299 |
| 200 | 1389 | 1418 | 1108 | 1508 | 1497 | 795  | -307 | -278 | 2    |
| 201 | 1009 | 1016 | 886  | 1390 | 1386 | 773  | -211 | -204 | -205 |
| 202 | 1000 | 1034 | 1913 | 1362 | 1355 | 1416 | -108 | -81  | 121  |
| 203 | 1345 | 1386 | 1005 | 1534 | 1526 | 1460 | -349 | -312 | -231 |
| 204 | 798  | 786  | 827  | 1393 | 1396 | 789  | -39  | -48  | 56   |
| 205 | 1372 | 1430 | 1372 | 1496 | 1487 | 1577 | -311 | -260 | -347 |
| 206 | 1444 | 1481 | 1076 | 797  | 793  | 1631 | -2   | 29   | -118 |
| 207 | 1281 | 1323 | 718  | 1494 | 1485 | 1368 | -370 | -330 | -34  |
| 208 | 1139 | 1171 | 1093 | 1412 | 1405 | 1450 | -232 | -204 | -308 |
| 209 | 1368 | 1402 | 934  | 1435 | 1427 | 1581 | -308 | -277 | -193 |
| 210 | 1420 | 1466 | 660  | 1574 | 1561 | 1287 | -149 | -110 | -41  |
| 211 | 989  | 996  | 1384 | 1386 | 1383 | 1508 | -214 | -207 | -311 |
| 212 | 727  | 708  | 970  | 1365 | 1368 | 1398 | -36  | -48  | -244 |
| 213 | 666  | 648  | 1013 | 1298 | 1301 | 1365 | -57  | -71  | -99  |
| 214 | 1197 | 1216 | 1362 | 1464 | 1456 | 1536 | -357 | -338 | -336 |
| 215 | 790  | 805  | 808  | 1364 | 1362 | 1404 | -124 | -113 | -35  |
| 216 | 1392 | 1440 | 1383 | 1545 | 1536 | 1497 | -333 | -289 | -303 |
| 217 | 1366 | 1408 | 1488 | 1436 | 1427 | 800  | -156 | -120 | 32   |
| 218 | 1238 | 1253 | 1275 | 1460 | 1450 | 1495 | -296 | -280 | -374 |
| 219 | 802  | 848  | 1153 | 795  | 794  | 1419 | -66  | -24  | -224 |
| 220 | 1354 | 1395 | 1352 | 1510 | 1496 | 1439 | -308 | -269 | -324 |
| 221 | 1492 | 1559 | 1444 | 1492 | 1483 | 1572 | -131 | -75  | -130 |
| 222 | 1288 | 1338 | 951  | 1434 | 1425 | 1395 | -280 | -238 | -246 |
| 223 | 1478 | 1537 | 728  | 1412 | 1406 | 1377 | -120 | -67  | -37  |
| 224 | 1234 | 1286 | 669  | 1476 | 1467 | 1309 | -303 | -259 | -57  |
| 225 | 1481 | 1506 | 1168 | 1516 | 1507 | 1467 | -126 | -104 | -383 |
| 226 | 1659 | 1720 | 798  | 1490 | 1481 | 1370 | -203 | -148 | -120 |
| 227 | 1437 | 1499 | 1412 | 1416 | 1408 | 1546 | -227 | -173 | -317 |



|     |      |      |      |      |      |      |      |      |      |
|-----|------|------|------|------|------|------|------|------|------|
| 228 | 1402 | 1460 | 1427 | 1432 | 1423 | 1435 | -241 | -192 | -108 |
| 229 | 1582 | 1635 | 1217 | 1482 | 1474 | 1462 | -210 | -164 | -315 |
| 230 | 1780 | 1860 | 821  | 1486 | 1478 | 814  | 88   | 156  | -50  |
| 231 | 1312 | 1337 | 1385 | 1661 | 1651 | 1507 | -166 | -144 | -281 |
| 232 | 1633 | 1702 | 1590 | 1374 | 1366 | 1492 | -102 | -41  | -53  |
| 233 | 1780 | 1860 | 1358 | 1486 | 1478 | 1434 | 168  | 242  | -226 |
| 234 | 993  | 1012 | 1555 | 1541 | 1538 | 1414 | -241 | -227 | -53  |
| 235 | 1649 | 1784 | 1305 | 1610 | 1598 | 1476 | -104 | 18   | -247 |
| 236 | 1758 | 1809 | 1501 | 1575 | 1565 | 1518 | -191 | -145 | -110 |
| 237 | 879  | 893  | 1711 | 1503 | 1503 | 1489 | -112 | -104 | -159 |
| 238 | 1364 | 1391 | 1513 | 1515 | 1508 | 1416 | -305 | -279 | -164 |
| 239 | 1682 | 1819 | 1483 | 1614 | 1601 | 1432 | -279 | -160 | -178 |
| 240 | 1537 | 1706 | 1632 | 1763 | 1747 | 1482 | -321 | -184 | -170 |
| 241 | 1332 | 1419 | 1893 | 1705 | 1697 | 1486 | -385 | -313 | 180  |
| 242 | 1630 | 1695 | 1336 | 1559 | 1551 | 1662 | -169 | -110 | -147 |
| 243 | 1371 | 1398 | 1710 | 1505 | 1498 | 1374 | -269 | -244 | -37  |
| 244 | 949  | 965  | 1893 | 1512 | 1511 | 1486 | -107 | -97  | 271  |
| 245 | 1743 | 1793 | 953  | 770  | 766  | 1554 | 170  | 216  | -272 |
| 246 | 1680 | 1761 | 1701 | 795  | 791  | 1612 | -65  | 7    | -59  |
| 247 | 1680 | 1816 | 1789 | 802  | 798  | 1576 | 152  | 265  | -166 |
| 248 | 1571 | 1720 | 846  | 1669 | 1656 | 1515 | -295 | -170 | -132 |
| 249 | 1513 | 1547 | 1341 | 1613 | 1604 | 1522 | -284 | -253 | -326 |
| 250 | 1569 | 1698 | 1743 | 1751 | 1740 | 1614 | -469 | -354 | -229 |
| 251 | 1771 | 1949 | 1583 | 1729 | 1714 | 1768 | -130 | 21   | -288 |
| 252 | 1175 | 1182 | 1340 | 1501 | 1497 | 1717 | -202 | -195 | -385 |
| 253 | 1588 | 1672 | 1646 | 1478 | 1470 | 1565 | -126 | -51  | -157 |
| 254 | 1665 | 1706 | 1348 | 1630 | 1621 | 1512 | -227 | -189 | -291 |
| 255 | 1120 | 1145 | 910  | 1545 | 1542 | 1524 | -254 | -235 | -134 |
| 256 | 1459 | 1578 | 1738 | 1734 | 1723 | 775  | -553 | -441 | 164  |
| 257 | 1327 | 1348 | 1725 | 1481 | 1474 | 801  | -156 | -136 | -27  |
| 258 | 1436 | 1474 | 1735 | 1709 | 1699 | 808  | -295 | -260 | 194  |
| 259 | 1590 | 1613 | 1614 | 1499 | 1490 | 1673 | -218 | -196 | -263 |
| 260 | 925  | 949  | 1533 | 1498 | 1497 | 1615 | -144 | -130 | -269 |
| 261 | 1186 | 1205 | 1587 | 1326 | 1323 | 1761 | -94  | -79  | -460 |
| 262 | 1078 | 1075 | 1818 | 1162 | 1163 | 1736 | 55   | 53   | -94  |
| 263 | 1085 | 1085 | 1121 | 1330 | 1328 | 1511 | -122 | -122 | -245 |
| 264 | 1371 | 1356 | 1623 | 1265 | 1261 | 1479 | 86   | 72   | -96  |
| 265 | 598  | 604  | 1692 | 1065 | 1071 | 1632 | 69   | 72   | -206 |
| 266 | 515  | 537  | 1083 | 1262 | 1270 | 1558 | 38   | 56   | -285 |
| 267 | 1506 | 1584 | 1495 | 1470 | 1460 | 1745 | -74  | -10  | -530 |
| 268 | 1280 | 1328 | 1298 | 1443 | 1439 | 1487 | -108 | -71  | -184 |
| 269 | 1200 | 1243 | 1461 | 1442 | 1441 | 1711 | -70  | -36  | -273 |
| 270 | 708  | 723  | 1608 | 1167 | 1170 | 1501 | 12   | 22   | -204 |
| 271 | 657  | 679  | 886  | 1158 | 1164 | 1511 | 23   | 42   | -169 |
| 272 | 620  | 646  | 1151 | 1142 | 1145 | 1333 | 52   | 70   | -123 |
| 273 | 1198 | 1268 | 1052 | 897  | 895  | 1172 | 1    | 52   | 36   |
| 274 | 973  | 1007 | 1060 | 1460 | 1460 | 1336 | -180 | -163 | -141 |
| 275 | 393  | 392  | 1341 | 849  | 846  | 1270 | 48   | 48   | 59   |
| 276 | 176  | 175  | 628  | 825  | 821  | 1076 | -19  | -19  | 88   |
| 277 | 166  | 164  | 546  | 780  | 775  | 1282 | -23  | -24  | 64   |

|     |     |     |      |      |      |      |      |      |      |
|-----|-----|-----|------|------|------|------|------|------|------|
| 278 | 226 | 222 | 1443 | 1022 | 1030 | 1474 | -28  | -30  | -123 |
| 279 | 236 | 231 | 1225 | 1093 | 1100 | 1451 | 19   | 16   | -150 |
| 280 | 237 | 236 | 1152 | 734  | 728  | 1453 | -58  | -59  | -110 |
| 281 | 287 | 286 | 721  | 743  | 737  | 1178 | -22  | -23  | 20   |
| 282 | 110 | 105 | 681  | 753  | 746  | 1174 | -58  | -62  | 44   |
| 283 | 225 | 223 | 644  | 1067 | 1075 | 1154 | -40  | -41  | 67   |
| 284 | 219 | 215 | 1147 | 1098 | 1105 | 899  | 31   | 28   | -35  |
| 285 | 113 | 110 | 930  | 1113 | 1122 | 1472 | 6    | 5    | -206 |
| 286 | 311 | 304 | 318  | 1095 | 1100 | 1104 | -153 | -158 | -149 |
| 287 | 151 | 150 | 140  | 1294 | 1296 | 1314 | -9   | -10  | -14  |
| 288 | 200 | 191 | 203  | 1161 | 1170 | 1169 | -202 | -209 | -201 |
| 289 | 175 | 169 | 180  | 1189 | 1199 | 1198 | -126 | -130 | -123 |

*MIROC-ESM-CHEM*

|    |     |     |     |      |      |      |     |     |     |
|----|-----|-----|-----|------|------|------|-----|-----|-----|
| 1  | 570 | 555 | 556 | 1027 | 1030 | 1037 | 18  | 15  | 15  |
| 2  | 669 | 651 | 658 | 847  | 844  | 852  | 73  | 64  | 67  |
| 3  | 616 | 614 | 597 | 644  | 644  | 643  | 76  | 75  | 66  |
| 4  | 674 | 660 | 656 | 867  | 863  | 874  | 74  | 65  | 61  |
| 5  | 504 | 492 | 500 | 705  | 705  | 705  | 44  | 36  | 41  |
| 6  | 580 | 598 | 557 | 910  | 903  | 921  | 24  | 35  | 10  |
| 7  | 717 | 747 | 682 | 943  | 936  | 955  | 102 | 126 | 74  |
| 8  | 538 | 527 | 529 | 909  | 920  | 919  | 45  | 38  | 39  |
| 9  | 568 | 575 | 553 | 893  | 883  | 900  | 22  | 26  | 16  |
| 10 | 768 | 745 | 734 | 649  | 648  | 646  | 98  | 92  | 89  |
| 11 | 542 | 561 | 516 | 935  | 928  | 948  | -4  | 7   | -17 |
| 12 | 643 | 625 | 633 | 849  | 847  | 853  | 58  | 48  | 51  |
| 13 | 600 | 619 | 566 | 962  | 957  | 982  | -31 | -20 | -51 |
| 14 | 607 | 585 | 593 | 922  | 927  | 925  | 50  | 39  | 43  |
| 15 | 493 | 470 | 483 | 734  | 738  | 736  | 35  | 18  | 27  |
| 16 | 577 | 558 | 562 | 964  | 968  | 969  | 30  | 23  | 24  |
| 17 | 534 | 553 | 508 | 630  | 627  | 628  | 25  | 36  | 10  |
| 18 | 463 | 454 | 457 | 1052 | 1060 | 1069 | 14  | 10  | 11  |
| 19 | 598 | 591 | 573 | 1215 | 1216 | 1244 | 0   | -1  | -8  |
| 20 | 696 | 691 | 663 | 1139 | 1140 | 1167 | 14  | 13  | -1  |
| 21 | 558 | 577 | 527 | 943  | 936  | 960  | -14 | -2  | -36 |
| 22 | 597 | 597 | 578 | 895  | 885  | 900  | 31  | 32  | 24  |
| 23 | 441 | 432 | 433 | 1141 | 1147 | 1166 | 8   | 6   | 6   |
| 24 | 838 | 842 | 792 | 1106 | 1106 | 1131 | 13  | 15  | -18 |
| 25 | 475 | 462 | 470 | 708  | 709  | 708  | 27  | 20  | 24  |
| 26 | 651 | 645 | 621 | 1180 | 1181 | 1209 | 28  | 25  | 11  |
| 27 | 635 | 615 | 623 | 861  | 861  | 864  | 65  | 54  | 58  |
| 28 | 552 | 568 | 535 | 926  | 917  | 936  | 8   | 16  | 0   |
| 29 | 528 | 506 | 515 | 800  | 803  | 804  | 32  | 19  | 24  |
| 30 | 682 | 684 | 654 | 1066 | 1062 | 1088 | 39  | 40  | 22  |
| 31 | 531 | 512 | 519 | 820  | 826  | 824  | 32  | 19  | 24  |
| 32 | 536 | 521 | 525 | 861  | 870  | 868  | 42  | 33  | 35  |
| 33 | 623 | 613 | 608 | 991  | 989  | 1002 | 40  | 36  | 32  |
| 34 | 515 | 495 | 505 | 732  | 733  | 735  | 42  | 29  | 35  |
| 35 | 609 | 621 | 582 | 949  | 943  | 966  | 8   | 16  | -10 |

|    |      |      |      |      |      |      |     |     |     |
|----|------|------|------|------|------|------|-----|-----|-----|
| 36 | 459  | 440  | 448  | 940  | 949  | 953  | 20  | 12  | 14  |
| 37 | 775  | 780  | 716  | 726  | 727  | 734  | 78  | 81  | 48  |
| 38 | 1009 | 1016 | 931  | 1123 | 1123 | 1147 | 72  | 77  | 6   |
| 39 | 737  | 747  | 683  | 1488 | 1478 | 1513 | 2   | 8   | -28 |
| 40 | 1141 | 1158 | 1051 | 1102 | 1101 | 1126 | 156 | 170 | 79  |
| 41 | 754  | 762  | 695  | 742  | 745  | 753  | 77  | 81  | 41  |
| 42 | 668  | 662  | 634  | 1174 | 1176 | 1204 | -38 | -41 | -58 |
| 43 | 561  | 560  | 530  | 741  | 746  | 754  | 34  | 33  | 27  |
| 44 | 672  | 689  | 630  | 1336 | 1323 | 1359 | 28  | 38  | 4   |
| 45 | 572  | 582  | 539  | 1259 | 1249 | 1281 | 12  | 17  | -2  |
| 46 | 870  | 882  | 820  | 1060 | 1060 | 1083 | 12  | 21  | -30 |
| 47 | 918  | 924  | 845  | 1196 | 1193 | 1219 | 60  | 64  | 2   |
| 48 | 537  | 534  | 509  | 1277 | 1276 | 1308 | 14  | 13  | 6   |
| 49 | 415  | 410  | 405  | 1290 | 1294 | 1318 | 2   | 1   | -1  |
| 50 | 475  | 477  | 452  | 1223 | 1218 | 1248 | 10  | 11  | 3   |
| 51 | 427  | 417  | 410  | 1168 | 1173 | 1194 | 14  | 12  | 10  |
| 52 | 457  | 462  | 435  | 1233 | 1226 | 1257 | 2   | 3   | -4  |
| 53 | 729  | 725  | 690  | 1171 | 1172 | 1200 | 4   | 3   | -10 |
| 54 | 937  | 951  | 876  | 1055 | 1054 | 1077 | 38  | 48  | -12 |
| 55 | 448  | 450  | 431  | 1424 | 1415 | 1445 | 3   | 4   | -1  |
| 56 | 591  | 611  | 590  | 1505 | 1697 | 1684 | -21 | -32 | -38 |
| 57 | 451  | 451  | 428  | 1124 | 1134 | 1141 | 15  | 14  | 6   |
| 58 | 514  | 525  | 488  | 1203 | 1196 | 1223 | 24  | 28  | 14  |
| 59 | 572  | 588  | 541  | 1194 | 1180 | 1216 | -9  | -2  | -21 |
| 60 | 437  | 431  | 414  | 1256 | 1256 | 1284 | 5   | 4   | 0   |
| 61 | 604  | 619  | 570  | 1182 | 1169 | 1203 | -6  | 2   | -22 |
| 62 | 455  | 472  | 441  | 1270 | 1283 | 1305 | -19 | -12 | -28 |
| 63 | 414  | 416  | 397  | 1393 | 1388 | 1417 | 4   | 4   | 0   |
| 64 | 553  | 573  | 550  | 1023 | 1035 | 1041 | 8   | 12  | 7   |
| 65 | 480  | 488  | 460  | 1320 | 1316 | 1341 | 13  | 14  | 8   |
| 66 | 591  | 613  | 558  | 974  | 987  | 993  | 38  | 44  | 24  |
| 67 | 584  | 612  | 557  | 1414 | 1410 | 1443 | 24  | 36  | 10  |
| 68 | 550  | 569  | 542  | 1442 | 1529 | 1536 | -17 | -15 | -29 |
| 69 | 481  | 493  | 459  | 1287 | 1281 | 1307 | 10  | 13  | 4   |
| 70 | 528  | 540  | 500  | 1166 | 1157 | 1187 | 14  | 18  | 5   |
| 71 | 761  | 785  | 715  | 1340 | 1325 | 1362 | 40  | 52  | 16  |
| 72 | 483  | 486  | 460  | 1186 | 1180 | 1209 | 11  | 12  | 5   |
| 73 | 460  | 466  | 440  | 771  | 783  | 782  | 19  | 20  | 12  |
| 74 | 450  | 458  | 431  | 1394 | 1387 | 1416 | 3   | 4   | -1  |
| 75 | 771  | 792  | 753  | 1298 | 1317 | 1335 | 70  | 75  | 63  |
| 76 | 504  | 522  | 489  | 1297 | 1319 | 1341 | 1   | 4   | -5  |
| 77 | 481  | 501  | 464  | 1341 | 1359 | 1383 | 1   | 8   | -8  |
| 78 | 624  | 653  | 591  | 1403 | 1390 | 1431 | -11 | 1   | -26 |
| 79 | 651  | 672  | 634  | 1284 | 1309 | 1328 | 41  | 45  | 34  |
| 80 | 505  | 514  | 480  | 1204 | 1195 | 1227 | 7   | 10  | -1  |
| 81 | 761  | 785  | 715  | 1340 | 1325 | 1362 | 32  | 45  | 10  |
| 82 | 549  | 570  | 543  | 1492 | 1651 | 1652 | -21 | -26 | -34 |
| 83 | 547  | 568  | 539  | 1507 | 1678 | 1682 | -21 | -27 | -37 |
| 84 | 515  | 524  | 489  | 1197 | 1187 | 1219 | 10  | 12  | 1   |
| 85 | 528  | 540  | 500  | 1166 | 1157 | 1187 | 25  | 29  | 15  |

|     |     |     |     |      |      |      |      |      |      |
|-----|-----|-----|-----|------|------|------|------|------|------|
| 86  | 444 | 444 | 434 | 680  | 682  | 688  | 20   | 20   | 16   |
| 87  | 572 | 588 | 571 | 1528 | 1744 | 1718 | -30  | -42  | -45  |
| 88  | 622 | 640 | 610 | 1397 | 1441 | 1452 | 14   | 15   | 9    |
| 89  | 462 | 466 | 439 | 1295 | 1290 | 1319 | 8    | 10   | 3    |
| 90  | 509 | 518 | 494 | 1399 | 1403 | 1427 | 5    | 6    | 3    |
| 91  | 808 | 859 | 800 | 1551 | 1543 | 1586 | -16  | 13   | -24  |
| 92  | 466 | 479 | 463 | 1456 | 1474 | 1481 | -17  | -14  | -19  |
| 93  | 324 | 315 | 319 | 1505 | 1503 | 1517 | 1    | 0    | 0    |
| 94  | 741 | 776 | 746 | 1417 | 1503 | 1388 | -4   | 4    | 3    |
| 95  | 445 | 440 | 431 | 1437 | 1430 | 1458 | 13   | 12   | 9    |
| 96  | 486 | 500 | 485 | 1455 | 1480 | 1483 | -18  | -16  | -20  |
| 97  | 570 | 572 | 572 | 1274 | 1272 | 1273 | 0    | 1    | 1    |
| 98  | 451 | 452 | 441 | 1610 | 1608 | 1623 | 1    | 1    | -3   |
| 99  | 539 | 552 | 538 | 1539 | 1775 | 1730 | -51  | -70  | -70  |
| 100 | 513 | 519 | 511 | 1375 | 1364 | 1367 | -2   | -1   | -2   |
| 101 | 568 | 584 | 567 | 1527 | 1519 | 1496 | -17  | -15  | -16  |
| 102 | 623 | 630 | 628 | 1154 | 1145 | 1149 | 4    | 9    | 7    |
| 103 | 505 | 509 | 504 | 1359 | 1353 | 1355 | 3    | 3    | 3    |
| 104 | 554 | 571 | 553 | 665  | 659  | 672  | 20   | 23   | 20   |
| 105 | 445 | 454 | 441 | 1533 | 1528 | 1540 | -15  | -12  | -17  |
| 106 | 458 | 462 | 448 | 1582 | 1584 | 1600 | -1   | 0    | -5   |
| 107 | 544 | 560 | 542 | 1509 | 1526 | 1484 | -25  | -23  | -24  |
| 108 | 585 | 604 | 587 | 1523 | 1527 | 1476 | -31  | -26  | -26  |
| 109 | 554 | 559 | 554 | 1327 | 1312 | 1315 | 2    | 3    | 2    |
| 110 | 460 | 452 | 462 | 1203 | 1201 | 1202 | 35   | 31   | 36   |
| 111 | 566 | 578 | 564 | 1459 | 1662 | 1637 | -46  | -63  | -65  |
| 112 | 517 | 528 | 513 | 1482 | 1466 | 1469 | -5   | -2   | -5   |
| 113 | 525 | 539 | 522 | 1487 | 1473 | 1475 | -12  | -8   | -12  |
| 114 | 402 | 404 | 400 | 1358 | 1360 | 1360 | -4   | -4   | -4   |
| 115 | 487 | 503 | 486 | 1492 | 1536 | 1517 | -24  | -23  | -25  |
| 116 | 400 | 405 | 396 | 1484 | 1467 | 1475 | -2   | -1   | -2   |
| 117 | 446 | 445 | 435 | 1630 | 1624 | 1640 | 9    | 8    | 5    |
| 118 | 525 | 539 | 522 | 1161 | 1173 | 1194 | 9    | 11   | 6    |
| 119 | 461 | 462 | 449 | 1556 | 1555 | 1574 | 2    | 2    | -2   |
| 120 | 553 | 553 | 555 | 1240 | 1238 | 1239 | 35   | 35   | 36   |
| 121 | 560 | 575 | 557 | 1508 | 1500 | 1486 | -9   | -5   | -8   |
| 122 | 418 | 412 | 419 | 1185 | 1197 | 1217 | 15   | 12   | 14   |
| 123 | 839 | 884 | 834 | 1669 | 1750 | 1787 | 13   | 21   | -1   |
| 124 | 839 | 884 | 834 | 1192 | 1203 | 1222 | 60   | 76   | 55   |
| 125 | 582 | 595 | 578 | 1542 | 1883 | 1823 | -109 | -152 | -151 |
| 126 | 436 | 439 | 434 | 1358 | 1358 | 1358 | -1   | -1   | -1   |
| 127 | 667 | 693 | 668 | 1437 | 1606 | 1511 | -44  | -55  | -53  |
| 128 | 554 | 567 | 554 | 1530 | 1780 | 1737 | -41  | -59  | -59  |
| 129 | 556 | 567 | 556 | 1436 | 1414 | 1414 | -8   | -3   | -6   |
| 130 | 402 | 405 | 398 | 1443 | 1439 | 1442 | 1    | 2    | 1    |
| 131 | 610 | 615 | 613 | 1224 | 1213 | 1217 | -14  | -10  | -12  |
| 132 | 472 | 462 | 473 | 1196 | 1203 | 1202 | 91   | 84   | 92   |
| 133 | 446 | 442 | 448 | 1291 | 1296 | 1294 | 26   | 24   | 27   |
| 134 | 560 | 576 | 559 | 1514 | 1511 | 1480 | -12  | -10  | -11  |
| 135 | 582 | 592 | 584 | 1317 | 1296 | 1301 | 5    | 10   | 7    |

|     |      |      |      |      |      |      |      |      |      |
|-----|------|------|------|------|------|------|------|------|------|
| 136 | 485  | 500  | 484  | 1549 | 1682 | 1656 | -22  | -25  | -27  |
| 137 | 461  | 469  | 459  | 1491 | 1472 | 1475 | -3   | -2   | -3   |
| 138 | 412  | 413  | 404  | 1613 | 1601 | 1615 | 13   | 14   | 9    |
| 139 | 380  | 391  | 393  | 1104 | 1105 | 1108 | 11   | 13   | 14   |
| 140 | 1489 | 1503 | 407  | 767  | 777  | 779  | 147  | 153  | 56   |
| 141 | 1655 | 1668 | 188  | 772  | 781  | 758  | 95   | 103  | -12  |
| 142 | 615  | 628  | 178  | 1191 | 1171 | 719  | 17   | 29   | -15  |
| 143 | 1378 | 1376 | 244  | 758  | 764  | 1042 | 116  | 112  | -15  |
| 144 | 678  | 700  | 257  | 1266 | 1236 | 1133 | -5   | 12   | 30   |
| 145 | 789  | 828  | 249  | 1233 | 1199 | 678  | -29  | 7    | -47  |
| 146 | 1139 | 1191 | 304  | 1496 | 1431 | 685  | -292 | -224 | -5   |
| 147 | 1207 | 1246 | 114  | 1499 | 1437 | 691  | -226 | -171 | -53  |
| 148 | 704  | 730  | 239  | 1317 | 1284 | 1066 | -58  | -37  | -30  |
| 149 | 673  | 710  | 240  | 1429 | 1475 | 1146 | -76  | -64  | 43   |
| 150 | 906  | 923  | 128  | 1395 | 1479 | 1162 | -270 | -284 | 11   |
| 151 | 642  | 657  | 1423 | 1293 | 1267 | 778  | 1    | 10   | 92   |
| 152 | 1402 | 1435 | 1582 | 1426 | 1494 | 782  | -289 | -291 | 31   |
| 153 | 1156 | 1229 | 618  | 1592 | 1514 | 1178 | -288 | -200 | 21   |
| 154 | 763  | 744  | 1309 | 1490 | 1535 | 766  | -77  | -91  | 59   |
| 155 | 1495 | 1506 | 683  | 1646 | 1627 | 1245 | -229 | -213 | 1    |
| 156 | 1542 | 1572 | 798  | 1378 | 1391 | 1209 | -178 | -158 | -19  |
| 157 | 1787 | 1818 | 1137 | 1337 | 1294 | 1455 | -64  | -23  | -276 |
| 158 | 662  | 700  | 1207 | 1317 | 1311 | 1450 | -126 | -100 | -206 |
| 159 | 823  | 828  | 712  | 1529 | 1862 | 1294 | -116 | -185 | -49  |
| 160 | 1413 | 1405 | 682  | 1475 | 1475 | 1353 | -248 | -254 | -60  |
| 161 | 1440 | 1442 | 901  | 1589 | 1605 | 1492 | -352 | -357 | -306 |
| 162 | 650  | 664  | 645  | 1215 | 1199 | 1275 | -25  | -13  | 4    |
| 163 | 783  | 783  | 1355 | 1352 | 1456 | 1441 | -158 | -180 | -335 |
| 164 | 1533 | 1575 | 1156 | 1369 | 1388 | 1563 | -159 | -132 | -278 |
| 165 | 793  | 779  | 762  | 1399 | 1471 | 1517 | -143 | -166 | -81  |
| 166 | 879  | 923  | 1461 | 1306 | 1294 | 1635 | -111 | -76  | -255 |
| 167 | 1112 | 1197 | 1485 | 1325 | 1272 | 1397 | -130 | -46  | -232 |
| 168 | 733  | 744  | 1722 | 1214 | 1221 | 1343 | 26   | 34   | -121 |
| 169 | 1353 | 1350 | 668  | 784  | 789  | 1275 | 154  | 151  | -114 |
| 170 | 1521 | 1545 | 787  | 771  | 778  | 1839 | 71   | 87   | -202 |
| 171 | 1276 | 1415 | 1374 | 1312 | 1254 | 1478 | -252 | -112 | -281 |
| 172 | 1194 | 1299 | 1400 | 765  | 771  | 1592 | -127 | -32  | -385 |
| 173 | 1183 | 1282 | 656  | 1375 | 1319 | 1205 | -378 | -265 | -19  |
| 174 | 1224 | 1354 | 772  | 1359 | 1292 | 1454 | -299 | -163 | -187 |
| 175 | 1449 | 1432 | 1472 | 766  | 773  | 1395 | 32   | 16   | -220 |
| 176 | 1193 | 1267 | 779  | 1470 | 1401 | 1460 | -251 | -167 | -164 |
| 177 | 1831 | 1856 | 896  | 1324 | 1294 | 1305 | -14  | 19   | -98  |
| 178 | 1133 | 1186 | 1120 | 1487 | 1423 | 1305 | -319 | -248 | -117 |
| 179 | 1197 | 1272 | 746  | 1603 | 1531 | 1218 | -252 | -164 | 36   |
| 180 | 1209 | 1247 | 1288 | 1502 | 1443 | 796  | -210 | -158 | 95   |
| 181 | 963  | 972  | 1460 | 1414 | 1476 | 785  | -196 | -209 | 16   |
| 182 | 663  | 682  | 1284 | 1289 | 1261 | 1290 | -5   | 8    | -239 |
| 183 | 786  | 796  | 1183 | 1516 | 1821 | 779  | -101 | -159 | -140 |
| 184 | 624  | 640  | 1188 | 1220 | 1200 | 1356 | -38  | -24  | -364 |
| 185 | 982  | 1016 | 1234 | 1476 | 1485 | 1333 | -337 | -314 | -282 |

|     |      |      |      |      |      |      |      |      |      |
|-----|------|------|------|------|------|------|------|------|------|
| 186 | 1006 | 1055 | 1398 | 1474 | 1528 | 781  | -367 | -358 | -15  |
| 187 | 875  | 927  | 1186 | 1242 | 1207 | 1434 | -26  | 20   | -247 |
| 188 | 1462 | 1460 | 1760 | 1499 | 1492 | 1327 | -220 | -219 | -74  |
| 189 | 1162 | 1230 | 1128 | 720  | 735  | 1449 | 72   | 121  | -305 |
| 190 | 885  | 887  | 1195 | 699  | 714  | 1586 | -191 | -193 | -246 |
| 191 | 2001 | 2018 | 1210 | 1290 | 1260 | 1456 | 244  | 270  | -193 |
| 192 | 992  | 1050 | 955  | 1364 | 1412 | 1477 | -216 | -182 | -222 |
| 193 | 880  | 931  | 667  | 709  | 722  | 1270 | 108  | 143  | -1   |
| 194 | 1451 | 1437 | 756  | 1502 | 1494 | 1809 | -253 | -261 | -176 |
| 195 | 1174 | 1166 | 629  | 1462 | 1466 | 1207 | -17  | -23  | -32  |
| 196 | 758  | 790  | 979  | 1279 | 1245 | 1510 | 3    | 26   | -353 |
| 197 | 1193 | 1231 | 1012 | 1494 | 1438 | 1551 | -245 | -193 | -402 |
| 198 | 975  | 1041 | 883  | 1416 | 1389 | 1218 | -120 | -60  | -14  |
| 199 | 676  | 705  | 1420 | 1223 | 1197 | 1494 | -20  | 4    | -252 |
| 200 | 1461 | 1527 | 1159 | 1432 | 1472 | 735  | -215 | -176 | 64   |
| 201 | 1087 | 1106 | 849  | 1451 | 1468 | 713  | -170 | -161 | -224 |
| 202 | 1055 | 1131 | 1916 | 1280 | 1242 | 1286 | -45  | 22   | 176  |
| 203 | 1414 | 1407 | 969  | 1525 | 1528 | 1435 | -289 | -296 | -254 |
| 204 | 849  | 898  | 890  | 1294 | 1256 | 721  | 13   | 52   | 113  |
| 205 | 1483 | 1490 | 1396 | 1495 | 1495 | 1512 | -219 | -214 | -301 |
| 206 | 1576 | 1588 | 1104 | 713  | 713  | 1443 | 141  | 150  | -50  |
| 207 | 1392 | 1418 | 765  | 1485 | 1466 | 1257 | -274 | -244 | 11   |
| 208 | 1190 | 1277 | 1192 | 1608 | 1520 | 1452 | -266 | -162 | -229 |
| 209 | 1474 | 1511 | 987  | 1537 | 1494 | 1417 | -277 | -224 | -110 |
| 210 | 1526 | 1531 | 683  | 1395 | 1430 | 1208 | 10   | -3   | -13  |
| 211 | 1072 | 1086 | 1428 | 1438 | 1474 | 1425 | -164 | -163 | -239 |
| 212 | 767  | 800  | 1081 | 1284 | 1250 | 1471 | 1    | 27   | -181 |
| 213 | 690  | 722  | 1055 | 1236 | 1207 | 1264 | -30  | -3   | -40  |
| 214 | 1270 | 1322 | 1372 | 1486 | 1434 | 1530 | -307 | -241 | -325 |
| 215 | 837  | 889  | 857  | 1290 | 1271 | 1274 | -76  | -35  | 22   |
| 216 | 1476 | 1469 | 1442 | 1497 | 1495 | 1490 | -244 | -248 | -251 |
| 217 | 1484 | 1502 | 1509 | 1328 | 1296 | 713  | -27  | -2   | 86   |
| 218 | 1280 | 1387 | 1361 | 1420 | 1354 | 1468 | -247 | -134 | -292 |
| 219 | 821  | 847  | 1188 | 691  | 687  | 1584 | -41  | -17  | -259 |
| 220 | 1403 | 1442 | 1453 | 1376 | 1425 | 1513 | -215 | -202 | -282 |
| 221 | 1591 | 1615 | 1457 | 1390 | 1350 | 1398 | -20  | 12   | -40  |
| 222 | 1393 | 1415 | 1065 | 1329 | 1293 | 1475 | -156 | -124 | -180 |
| 223 | 1537 | 1568 | 773  | 1338 | 1303 | 1263 | -57  | -23  | 9    |
| 224 | 1327 | 1346 | 697  | 1372 | 1335 | 1219 | -193 | -165 | -23  |
| 225 | 1522 | 1543 | 1258 | 1488 | 1464 | 1452 | -86  | -64  | -301 |
| 226 | 1743 | 1762 | 841  | 1413 | 1379 | 1264 | -104 | -76  | -67  |
| 227 | 1519 | 1550 | 1426 | 1330 | 1293 | 1506 | -134 | -97  | -288 |
| 228 | 1496 | 1525 | 1429 | 1336 | 1297 | 1324 | -126 | -87  | -68  |
| 229 | 1653 | 1675 | 1273 | 1427 | 1391 | 1388 | -133 | -101 | -244 |
| 230 | 1874 | 1906 | 791  | 1393 | 1353 | 693  | 192  | 230  | -69  |
| 231 | 1343 | 1367 | 1351 | 1601 | 1564 | 1396 | -131 | -104 | -266 |
| 232 | 1725 | 1761 | 1530 | 1288 | 1250 | 1389 | -1   | 40   | -69  |
| 233 | 1874 | 1906 | 1344 | 1393 | 1353 | 1327 | 266  | 300  | -192 |
| 234 | 1038 | 1040 | 1487 | 1602 | 1647 | 1338 | -230 | -243 | -101 |
| 235 | 1671 | 1655 | 1278 | 1695 | 1702 | 1369 | -100 | -116 | -230 |

|     |      |      |      |      |      |      |      |      |      |
|-----|------|------|------|------|------|------|------|------|------|
| 236 | 1783 | 1787 | 1462 | 1641 | 1675 | 1483 | -196 | -207 | -135 |
| 237 | 913  | 899  | 1674 | 1532 | 1589 | 1413 | -100 | -120 | -163 |
| 238 | 1419 | 1452 | 1471 | 1756 | 1715 | 1331 | -350 | -307 | -174 |
| 239 | 1714 | 1699 | 1448 | 1686 | 1700 | 1336 | -285 | -304 | -164 |
| 240 | 1543 | 1533 | 1587 | 1768 | 1761 | 1423 | -318 | -323 | -185 |
| 241 | 1355 | 1368 | 1807 | 1826 | 1817 | 1392 | -422 | -408 | 137  |
| 242 | 1680 | 1690 | 1288 | 1919 | 1917 | 1593 | -229 | -221 | -175 |
| 243 | 1432 | 1465 | 1667 | 1741 | 1697 | 1288 | -300 | -257 | -50  |
| 244 | 987  | 976  | 1807 | 1551 | 1612 | 1392 | -92  | -113 | 205  |
| 245 | 1812 | 1833 | 1044 | 695  | 695  | 1640 | 243  | 263  | -238 |
| 246 | 1697 | 1689 | 1645 | 715  | 715  | 1680 | -29  | -36  | -121 |
| 247 | 1705 | 1689 | 1729 | 718  | 718  | 1646 | 213  | 200  | -243 |
| 248 | 1583 | 1571 | 904  | 1742 | 1739 | 1569 | -320 | -329 | -113 |
| 249 | 1547 | 1554 | 1410 | 1646 | 1656 | 1730 | -271 | -269 | -348 |
| 250 | 1562 | 1579 | 1692 | 1857 | 1847 | 1674 | -544 | -523 | -298 |
| 251 | 1738 | 1749 | 1537 | 1779 | 1768 | 1748 | -174 | -161 | -313 |
| 252 | 1244 | 1245 | 1369 | 1579 | 1632 | 1813 | -184 | -205 | -405 |
| 253 | 1675 | 1668 | 1654 | 1519 | 1555 | 1910 | -60  | -75  | -250 |
| 254 | 1684 | 1691 | 1419 | 1699 | 1722 | 1713 | -240 | -243 | -302 |
| 255 | 1166 | 1176 | 983  | 1611 | 1644 | 1591 | -249 | -255 | -104 |
| 256 | 1486 | 1479 | 1779 | 2050 | 2039 | 695  | -776 | -774 | 213  |
| 257 | 1392 | 1427 | 1661 | 1664 | 1618 | 716  | -123 | -85  | -61  |
| 258 | 1434 | 1447 | 1680 | 1794 | 1808 | 719  | -312 | -303 | 193  |
| 259 | 1651 | 1663 | 1565 | 1469 | 1452 | 1724 | -156 | -139 | -325 |
| 260 | 963  | 957  | 1499 | 1503 | 1547 | 1643 | -123 | -139 | -308 |
| 261 | 1268 | 1245 | 1591 | 1307 | 1330 | 1834 | -26  | -49  | -505 |
| 262 | 1101 | 1053 | 1755 | 1131 | 1149 | 1757 | 77   | 41   | -152 |
| 263 | 1145 | 1103 | 1236 | 1296 | 1320 | 1621 | -72  | -107 | -207 |
| 264 | 1434 | 1380 | 1639 | 1237 | 1255 | 1535 | 145  | 94   | -96  |
| 265 | 602  | 605  | 1629 | 1040 | 1040 | 1693 | 74   | 76   | -282 |
| 266 | 500  | 482  | 1180 | 1200 | 1196 | 1646 | 28   | 13   | -253 |
| 267 | 1610 | 1626 | 1475 | 1479 | 1494 | 2032 | 3    | 9    | -772 |
| 268 | 1373 | 1374 | 1382 | 1448 | 1468 | 1635 | -41  | -47  | -128 |
| 269 | 1277 | 1271 | 1394 | 1452 | 1473 | 1784 | -12  | -21  | -346 |
| 270 | 714  | 704  | 1586 | 1140 | 1146 | 1468 | 20   | 12   | -209 |
| 271 | 659  | 644  | 970  | 1124 | 1125 | 1524 | 27   | 14   | -125 |
| 272 | 604  | 609  | 1232 | 1113 | 1119 | 1322 | 43   | 46   | -57  |
| 273 | 1302 | 1313 | 1082 | 814  | 821  | 1136 | 117  | 120  | 63   |
| 274 | 1040 | 1032 | 1110 | 1472 | 1494 | 1307 | -151 | -163 | -98  |
| 275 | 409  | 404  | 1384 | 765  | 776  | 1238 | 57   | 55   | 100  |
| 276 | 186  | 183  | 612  | 745  | 756  | 1044 | -12  | -14  | 80   |
| 277 | 175  | 170  | 495  | 707  | 718  | 1200 | -16  | -19  | 24   |
| 278 | 239  | 233  | 1631 | 1040 | 1036 | 1485 | -19  | -23  | 17   |
| 279 | 250  | 246  | 1363 | 1133 | 1129 | 1459 | 26   | 24   | -52  |
| 280 | 249  | 246  | 1268 | 665  | 678  | 1463 | -47  | -49  | -21  |
| 281 | 302  | 298  | 718  | 672  | 685  | 1142 | -7   | -12  | 23   |
| 282 | 110  | 108  | 660  | 678  | 692  | 1125 | -57  | -59  | 28   |
| 283 | 236  | 230  | 626  | 1065 | 1061 | 1114 | -32  | -36  | 58   |
| 284 | 233  | 229  | 1319 | 1146 | 1141 | 829  | 39   | 36   | 121  |
| 285 | 123  | 122  | 1028 | 1164 | 1157 | 1484 | 9    | 8    | -161 |

|     |     |     |     |      |      |      |      |      |      |
|-----|-----|-----|-----|------|------|------|------|------|------|
| 286 | 411 | 417 | 423 | 1181 | 1167 | 1181 | -91  | -85  | -82  |
| 287 | 167 | 168 | 168 | 1309 | 1310 | 1324 | -2   | -2   | -2   |
| 288 | 268 | 277 | 276 | 1229 | 1216 | 1232 | -159 | -151 | -153 |
| 289 | 246 | 251 | 255 | 1274 | 1260 | 1278 | -85  | -81  | -79  |

*NorESM1-M*

|    |      |      |      |      |      |      |     |     |     |
|----|------|------|------|------|------|------|-----|-----|-----|
| 1  | 589  | 562  | 569  | 1057 | 1067 | 1081 | 20  | 14  | 15  |
| 2  | 693  | 686  | 687  | 925  | 928  | 937  | 76  | 72  | 71  |
| 3  | 640  | 599  | 612  | 695  | 695  | 704  | 82  | 62  | 67  |
| 4  | 709  | 691  | 689  | 923  | 930  | 937  | 91  | 79  | 76  |
| 5  | 512  | 513  | 511  | 768  | 765  | 775  | 41  | 42  | 40  |
| 6  | 602  | 577  | 592  | 933  | 949  | 950  | 33  | 18  | 26  |
| 7  | 731  | 704  | 732  | 958  | 974  | 976  | 112 | 89  | 111 |
| 8  | 558  | 534  | 526  | 958  | 964  | 988  | 51  | 38  | 31  |
| 9  | 601  | 578  | 578  | 935  | 946  | 948  | 31  | 21  | 20  |
| 10 | 789  | 788  | 769  | 687  | 687  | 693  | 101 | 100 | 94  |
| 11 | 556  | 533  | 552  | 948  | 965  | 967  | 1   | -12 | -3  |
| 12 | 666  | 657  | 659  | 921  | 924  | 934  | 61  | 56  | 56  |
| 13 | 596  | 567  | 593  | 962  | 983  | 985  | -33 | -52 | -38 |
| 14 | 628  | 610  | 618  | 983  | 988  | 1001 | 54  | 45  | 47  |
| 15 | 494  | 493  | 488  | 805  | 804  | 818  | 28  | 27  | 22  |
| 16 | 597  | 575  | 583  | 1014 | 1021 | 1036 | 32  | 24  | 25  |
| 17 | 546  | 521  | 541  | 668  | 665  | 670  | 26  | 13  | 23  |
| 18 | 473  | 445  | 439  | 1075 | 1088 | 1107 | 17  | 5   | 1   |
| 19 | 610  | 566  | 587  | 1219 | 1250 | 1248 | 3   | -10 | -5  |
| 20 | 697  | 649  | 676  | 1158 | 1187 | 1188 | 12  | -9  | 1   |
| 21 | 562  | 536  | 559  | 946  | 964  | 966  | -12 | -31 | -17 |
| 22 | 628  | 613  | 606  | 955  | 961  | 963  | 35  | 30  | 27  |
| 23 | 434  | 403  | 401  | 1121 | 1142 | 1149 | 8   | 1   | 0   |
| 24 | 813  | 765  | 799  | 1128 | 1154 | 1156 | -6  | -38 | -20 |
| 25 | 476  | 478  | 477  | 777  | 776  | 786  | 19  | 20  | 18  |
| 26 | 657  | 611  | 636  | 1194 | 1224 | 1224 | 29  | 5   | 16  |
| 27 | 658  | 647  | 651  | 930  | 933  | 943  | 70  | 63  | 65  |
| 28 | 577  | 555  | 564  | 963  | 977  | 978  | 14  | 4   | 7   |
| 29 | 553  | 542  | 542  | 871  | 868  | 883  | 38  | 32  | 30  |
| 30 | 703  | 652  | 675  | 1064 | 1088 | 1093 | 50  | 21  | 32  |
| 31 | 554  | 539  | 536  | 888  | 889  | 907  | 38  | 29  | 25  |
| 32 | 556  | 538  | 531  | 920  | 923  | 944  | 48  | 37  | 31  |
| 33 | 647  | 621  | 627  | 1013 | 1024 | 1033 | 48  | 35  | 37  |
| 34 | 533  | 529  | 526  | 801  | 797  | 809  | 47  | 44  | 41  |
| 35 | 623  | 588  | 608  | 965  | 984  | 987  | 15  | -9  | 3   |
| 36 | 460  | 441  | 433  | 944  | 954  | 975  | 20  | 12  | 7   |
| 37 | 747  | 699  | 746  | 860  | 846  | 864  | 42  | 21  | 41  |
| 38 | 973  | 920  | 968  | 1133 | 1153 | 1150 | 42  | -3  | 35  |
| 39 | 683  | 648  | 695  | 1502 | 1525 | 1524 | -27 | -47 | -24 |
| 40 | 1091 | 1040 | 1087 | 1106 | 1124 | 1120 | 115 | 71  | 110 |
| 41 | 715  | 674  | 719  | 877  | 866  | 883  | 33  | 11  | 34  |
| 42 | 669  | 623  | 651  | 1200 | 1230 | 1231 | -42 | -67 | -55 |
| 43 | 560  | 519  | 548  | 867  | 857  | 874  | 28  | 21  | 25  |



|    |     |     |     |      |      |      |     |     |     |
|----|-----|-----|-----|------|------|------|-----|-----|-----|
| 44 | 651 | 596 | 649 | 1329 | 1368 | 1356 | 17  | -15 | 14  |
| 45 | 562 | 513 | 556 | 1259 | 1292 | 1281 | 8   | -13 | 4   |
| 46 | 837 | 793 | 826 | 1072 | 1095 | 1096 | -15 | -53 | -28 |
| 47 | 878 | 828 | 878 | 1205 | 1226 | 1223 | 29  | -11 | 27  |
| 48 | 538 | 498 | 524 | 1282 | 1312 | 1303 | 14  | 4   | 10  |
| 49 | 414 | 381 | 383 | 1269 | 1296 | 1297 | 2   | -4  | -4  |
| 50 | 473 | 434 | 461 | 1226 | 1254 | 1246 | 9   | -1  | 5   |
| 51 | 406 | 372 | 376 | 1137 | 1161 | 1164 | 11  | 3   | 4   |
| 52 | 441 | 406 | 424 | 1220 | 1246 | 1246 | -1  | -9  | -6  |
| 53 | 722 | 675 | 705 | 1197 | 1226 | 1228 | -1  | -18 | -9  |
| 54 | 897 | 854 | 887 | 1060 | 1080 | 1078 | 7   | -29 | -3  |
| 55 | 418 | 412 | 425 | 1337 | 1345 | 1337 | 0   | -1  | 2   |
| 56 | 579 | 586 | 604 | 1346 | 1344 | 1343 | -11 | -8  | -2  |
| 57 | 428 | 394 | 407 | 1147 | 1135 | 1160 | 6   | -5  | -2  |
| 58 | 486 | 453 | 471 | 1172 | 1194 | 1195 | 16  | 4   | 10  |
| 59 | 546 | 504 | 530 | 1198 | 1227 | 1231 | -17 | -34 | -26 |
| 60 | 414 | 380 | 391 | 1200 | 1224 | 1223 | 3   | -5  | -2  |
| 61 | 581 | 534 | 566 | 1185 | 1213 | 1214 | -15 | -38 | -25 |
| 62 | 436 | 416 | 433 | 1220 | 1236 | 1225 | -24 | -35 | -26 |
| 63 | 388 | 374 | 386 | 1308 | 1324 | 1314 | 2   | -1  | 1   |
| 64 | 542 | 546 | 567 | 1079 | 1047 | 1085 | 4   | 6   | 8   |
| 65 | 451 | 426 | 437 | 1256 | 1277 | 1268 | 9   | 4   | 6   |
| 66 | 560 | 520 | 545 | 1045 | 1008 | 1047 | 20  | 9   | 15  |
| 67 | 556 | 523 | 549 | 1383 | 1410 | 1406 | 14  | -2  | 9   |
| 68 | 534 | 529 | 548 | 1342 | 1348 | 1340 | -16 | -19 | -9  |
| 69 | 453 | 427 | 441 | 1242 | 1264 | 1260 | 5   | -2  | 2   |
| 70 | 499 | 463 | 482 | 1148 | 1172 | 1176 | 8   | -4  | 1   |
| 71 | 736 | 674 | 727 | 1339 | 1376 | 1371 | 28  | -4  | 21  |
| 72 | 464 | 426 | 441 | 1159 | 1183 | 1186 | 8   | -2  | 1   |
| 73 | 431 | 410 | 421 | 879  | 857  | 884  | 3   | -2  | 0   |
| 74 | 421 | 406 | 420 | 1312 | 1327 | 1317 | 0   | -3  | 0   |
| 75 | 733 | 714 | 740 | 1241 | 1251 | 1242 | 63  | 57  | 65  |
| 76 | 484 | 463 | 483 | 1245 | 1261 | 1249 | -2  | -7  | -2  |
| 77 | 462 | 439 | 460 | 1293 | 1313 | 1301 | -3  | -14 | -5  |
| 78 | 591 | 553 | 582 | 1405 | 1437 | 1442 | -23 | -41 | -30 |
| 79 | 622 | 600 | 625 | 1233 | 1246 | 1235 | 36  | 30  | 37  |
| 80 | 483 | 444 | 462 | 1192 | 1219 | 1224 | 2   | -9  | -5  |
| 81 | 736 | 674 | 727 | 1339 | 1376 | 1371 | 21  | -10 | 14  |
| 82 | 535 | 533 | 554 | 1368 | 1372 | 1366 | -16 | -17 | -11 |
| 83 | 532 | 529 | 551 | 1395 | 1401 | 1393 | -18 | -19 | -12 |
| 84 | 492 | 453 | 471 | 1185 | 1211 | 1216 | 4   | -7  | -3  |
| 85 | 499 | 463 | 482 | 1148 | 1172 | 1176 | 17  | 6   | 11  |
| 86 | 398 | 420 | 418 | 781  | 766  | 785  | -1  | 7   | 5   |
| 87 | 570 | 580 | 594 | 1357 | 1353 | 1357 | -17 | -14 | -11 |
| 88 | 598 | 589 | 609 | 1308 | 1314 | 1306 | 13  | 11  | 16  |
| 89 | 436 | 408 | 422 | 1244 | 1266 | 1264 | 5   | -1  | 2   |
| 90 | 480 | 470 | 485 | 1319 | 1328 | 1319 | 4   | 3   | 5   |
| 91 | 767 | 763 | 794 | 1456 | 1450 | 1450 | -24 | -25 | -9  |
| 92 | 437 | 449 | 454 | 1354 | 1349 | 1346 | -18 | -15 | -14 |
| 93 | 296 | 298 | 305 | 1409 | 1407 | 1405 | -1  | -1  | 0   |

|     |      |      |     |      |      |      |     |     |     |
|-----|------|------|-----|------|------|------|-----|-----|-----|
| 94  | 773  | 786  | 763 | 1296 | 1279 | 1315 | 30  | 39  | 22  |
| 95  | 414  | 406  | 419 | 1351 | 1359 | 1352 | 9   | 7   | 10  |
| 96  | 455  | 471  | 476 | 1349 | 1343 | 1342 | -20 | -15 | -13 |
| 97  | 546  | 556  | 557 | 1278 | 1280 | 1286 | -12 | -7  | -7  |
| 98  | 409  | 426  | 427 | 1493 | 1484 | 1481 | -7  | -1  | -1  |
| 99  | 546  | 560  | 568 | 1375 | 1368 | 1378 | -32 | -25 | -24 |
| 100 | 470  | 493  | 485 | 1337 | 1327 | 1336 | -9  | -4  | -6  |
| 101 | 526  | 557  | 550 | 1431 | 1415 | 1426 | -18 | -13 | -15 |
| 102 | 607  | 615  | 614 | 1168 | 1173 | 1179 | -7  | -3  | -5  |
| 103 | 464  | 485  | 477 | 1327 | 1319 | 1327 | -1  | 2   | 1   |
| 104 | 524  | 552  | 548 | 723  | 719  | 727  | 14  | 18  | 17  |
| 105 | 403  | 424  | 423 | 1431 | 1421 | 1419 | -22 | -15 | -15 |
| 106 | 421  | 433  | 435 | 1468 | 1462 | 1458 | -7  | -3  | -2  |
| 107 | 518  | 544  | 541 | 1400 | 1385 | 1396 | -24 | -18 | -19 |
| 108 | 559  | 586  | 578 | 1421 | 1404 | 1422 | -29 | -21 | -24 |
| 109 | 512  | 533  | 522 | 1292 | 1283 | 1294 | -3  | 1   | -1  |
| 110 | 433  | 435  | 445 | 1199 | 1199 | 1200 | 24  | 24  | 29  |
| 111 | 582  | 594  | 601 | 1319 | 1310 | 1321 | -28 | -23 | -22 |
| 112 | 459  | 490  | 488 | 1396 | 1382 | 1383 | -13 | -6  | -6  |
| 113 | 472  | 501  | 501 | 1395 | 1381 | 1382 | -18 | -11 | -11 |
| 114 | 369  | 386  | 381 | 1332 | 1326 | 1331 | -6  | -5  | -5  |
| 115 | 463  | 482  | 487 | 1386 | 1376 | 1380 | -23 | -18 | -18 |
| 116 | 351  | 376  | 373 | 1421 | 1406 | 1409 | -6  | -3  | -3  |
| 117 | 402  | 420  | 421 | 1510 | 1500 | 1498 | 1   | 6   | 6   |
| 118 | 472  | 501  | 501 | 1183 | 1186 | 1201 | -5  | 2   | 1   |
| 119 | 423  | 432  | 437 | 1449 | 1445 | 1440 | -3  | -1  | 1   |
| 120 | 531  | 537  | 540 | 1249 | 1252 | 1258 | 24  | 26  | 27  |
| 121 | 511  | 542  | 541 | 1410 | 1396 | 1400 | -13 | -6  | -7  |
| 122 | 394  | 396  | 404 | 1206 | 1206 | 1223 | 6   | 7   | 9   |
| 123 | 811  | 809  | 841 | 1514 | 1508 | 1507 | 18  | 18  | 30  |
| 124 | 811  | 809  | 841 | 1213 | 1211 | 1228 | 47  | 46  | 56  |
| 125 | 621  | 634  | 619 | 1411 | 1395 | 1430 | -72 | -64 | -76 |
| 126 | 401  | 419  | 413 | 1330 | 1324 | 1330 | -3  | -2  | -2  |
| 127 | 701  | 714  | 694 | 1317 | 1301 | 1336 | -12 | -5  | -18 |
| 128 | 569  | 583  | 590 | 1374 | 1366 | 1378 | -23 | -19 | -18 |
| 129 | 509  | 537  | 526 | 1374 | 1357 | 1374 | -15 | -7  | -11 |
| 130 | 361  | 383  | 380 | 1399 | 1389 | 1393 | -1  | 1   | 0   |
| 131 | 589  | 599  | 597 | 1232 | 1235 | 1242 | -29 | -23 | -25 |
| 132 | 443  | 446  | 458 | 1201 | 1201 | 1202 | 71  | 73  | 81  |
| 133 | 422  | 426  | 433 | 1286 | 1286 | 1290 | 15  | 17  | 20  |
| 134 | 521  | 551  | 545 | 1416 | 1400 | 1411 | -14 | -8  | -10 |
| 135 | 543  | 563  | 551 | 1277 | 1266 | 1283 | -4  | 3   | -2  |
| 136 | 475  | 484  | 494 | 1382 | 1377 | 1379 | -16 | -14 | -13 |
| 137 | 412  | 439  | 434 | 1419 | 1402 | 1409 | -5  | -3  | -3  |
| 138 | 367  | 389  | 387 | 1503 | 1491 | 1491 | -3  | 8   | 7   |
| 139 | 347  | 341  | 344 | 1151 | 1160 | 1161 | 2   | 1   | 2   |
| 140 | 1480 | 1551 | 396 | 875  | 854  | 856  | 100 | 162 | 49  |
| 141 | 1618 | 1706 | 183 | 874  | 854  | 828  | 32  | 112 | -16 |
| 142 | 585  | 596  | 181 | 1165 | 1161 | 779  | -2  | 6   | -16 |
| 143 | 1355 | 1429 | 247 | 851  | 832  | 1044 | 67  | 131 | -13 |

|     |      |      |      |      |      |      |      |      |      |
|-----|------|------|------|------|------|------|------|------|------|
| 144 | 644  | 661  | 258  | 1216 | 1203 | 1128 | -17  | -5   | 31   |
| 145 | 773  | 788  | 241  | 1178 | 1162 | 737  | -33  | -20  | -55  |
| 146 | 1182 | 1177 | 293  | 1212 | 1219 | 748  | -136 | -143 | -16  |
| 147 | 1246 | 1240 | 115  | 1238 | 1246 | 759  | -87  | -96  | -54  |
| 148 | 675  | 692  | 238  | 1264 | 1248 | 1072 | -64  | -51  | -31  |
| 149 | 698  | 710  | 235  | 1303 | 1285 | 1139 | -43  | -34  | 40   |
| 150 | 939  | 936  | 123  | 1206 | 1212 | 1149 | -182 | -186 | 9    |
| 151 | 606  | 620  | 1455 | 1246 | 1236 | 881  | -7   | -1   | 79   |
| 152 | 1491 | 1517 | 1602 | 1315 | 1314 | 879  | -167 | -146 | 17   |
| 153 | 1210 | 1223 | 586  | 1193 | 1193 | 1177 | -93  | -84  | -3   |
| 154 | 834  | 846  | 1313 | 1378 | 1384 | 855  | -30  | -26  | 32   |
| 155 | 1601 | 1581 | 641  | 1296 | 1320 | 1230 | -41  | -65  | -20  |
| 156 | 1621 | 1655 | 757  | 1312 | 1306 | 1201 | -84  | -54  | -49  |
| 157 | 1786 | 1860 | 1180 | 1335 | 1314 | 1235 | -65  | 4    | -147 |
| 158 | 684  | 691  | 1244 | 1233 | 1216 | 1259 | -96  | -88  | -98  |
| 159 | 852  | 870  | 671  | 1405 | 1381 | 1279 | -74  | -59  | -69  |
| 160 | 1568 | 1491 | 689  | 1324 | 1346 | 1323 | -63  | -134 | -51  |
| 161 | 1614 | 1509 | 913  | 1413 | 1440 | 1227 | -132 | -229 | -210 |
| 162 | 629  | 639  | 604  | 1209 | 1211 | 1259 | -38  | -31  | -10  |
| 163 | 831  | 829  | 1470 | 1221 | 1229 | 1338 | -95  | -98  | -194 |
| 164 | 1589 | 1643 | 1205 | 1322 | 1309 | 1215 | -94  | -44  | -106 |
| 165 | 855  | 854  | 822  | 1252 | 1261 | 1392 | -72  | -74  | -37  |
| 166 | 889  | 891  | 1562 | 1271 | 1277 | 1330 | -95  | -96  | -84  |
| 167 | 1132 | 1140 | 1601 | 1205 | 1191 | 1332 | -75  | -65  | -110 |
| 168 | 756  | 755  | 1783 | 1212 | 1221 | 1352 | 44   | 43   | -74  |
| 169 | 1304 | 1386 | 661  | 910  | 906  | 1261 | 94   | 167  | -116 |
| 170 | 1522 | 1589 | 811  | 899  | 895  | 1433 | 9    | 64   | -102 |
| 171 | 1342 | 1357 | 1512 | 1190 | 1185 | 1353 | -162 | -147 | -120 |
| 172 | 1249 | 1272 | 1570 | 873  | 869  | 1444 | -93  | -72  | -182 |
| 173 | 1231 | 1240 | 633  | 1225 | 1215 | 1221 | -258 | -245 | -37  |
| 174 | 1289 | 1305 | 803  | 1203 | 1198 | 1239 | -190 | -174 | -119 |
| 175 | 1582 | 1525 | 1572 | 842  | 840  | 1343 | 111  | 66   | -117 |
| 176 | 1236 | 1240 | 831  | 1219 | 1224 | 1268 | -139 | -137 | -91  |
| 177 | 1805 | 1891 | 872  | 1318 | 1295 | 1290 | -33  | 48   | -112 |
| 178 | 1178 | 1174 | 1093 | 1224 | 1231 | 1231 | -165 | -171 | -114 |
| 179 | 1254 | 1269 | 735  | 1191 | 1191 | 1223 | -42  | -30  | 27   |
| 180 | 1253 | 1246 | 1269 | 1238 | 1247 | 920  | -78  | -86  | 62   |
| 181 | 1009 | 999  | 1511 | 1216 | 1223 | 910  | -100 | -110 | -6   |
| 182 | 628  | 641  | 1318 | 1239 | 1228 | 1214 | -15  | -7   | -190 |
| 183 | 821  | 834  | 1225 | 1394 | 1372 | 884  | -59  | -48  | -118 |
| 184 | 600  | 610  | 1196 | 1198 | 1196 | 1252 | -51  | -44  | -302 |
| 185 | 1019 | 1018 | 1266 | 1203 | 1208 | 1227 | -193 | -196 | -218 |
| 186 | 1026 | 1041 | 1541 | 1364 | 1369 | 854  | -294 | -285 | 74   |
| 187 | 873  | 884  | 1235 | 1178 | 1162 | 1244 | -14  | -3   | -147 |
| 188 | 1582 | 1540 | 1795 | 1294 | 1315 | 1334 | -40  | -82  | -48  |
| 189 | 1215 | 1229 | 1174 | 801  | 797  | 1249 | 85   | 98   | -179 |
| 190 | 845  | 878  | 1244 | 777  | 773  | 1214 | -239 | -211 | -59  |
| 191 | 1946 | 2049 | 1247 | 1279 | 1251 | 1260 | 204  | 299  | -90  |
| 192 | 1020 | 1040 | 982  | 1266 | 1253 | 1236 | -168 | -148 | -126 |
| 193 | 865  | 874  | 623  | 790  | 785  | 1253 | 83   | 90   | -19  |

|     |      |      |      |      |      |      |      |      |      |
|-----|------|------|------|------|------|------|------|------|------|
| 194 | 1574 | 1534 | 782  | 1382 | 1393 | 1424 | -104 | -142 | -84  |
| 195 | 1082 | 1151 | 600  | 1428 | 1396 | 1212 | -57  | -11  | -53  |
| 196 | 728  | 743  | 1003 | 1224 | 1209 | 1224 | -5   | 6    | -215 |
| 197 | 1239 | 1231 | 990  | 1227 | 1238 | 1389 | -107 | -117 | -334 |
| 198 | 987  | 991  | 845  | 1278 | 1276 | 1207 | -76  | -73  | -41  |
| 199 | 656  | 664  | 1529 | 1181 | 1177 | 1325 | -29  | -23  | -95  |
| 200 | 1547 | 1559 | 1202 | 1263 | 1268 | 806  | -72  | -64  | 73   |
| 201 | 1135 | 1125 | 826  | 1218 | 1226 | 782  | -57  | -67  | -256 |
| 202 | 1088 | 1099 | 1925 | 1200 | 1185 | 1293 | 2    | 14   | 181  |
| 203 | 1566 | 1487 | 977  | 1373 | 1394 | 1302 | -103 | -176 | -212 |
| 204 | 827  | 839  | 841  | 1218 | 1209 | 796  | 12   | 22   | 64   |
| 205 | 1599 | 1569 | 1536 | 1294 | 1311 | 1406 | -40  | -72  | -145 |
| 206 | 1518 | 1612 | 1060 | 785  | 784  | 1440 | 63   | 139  | -73  |
| 207 | 1475 | 1463 | 718  | 1277 | 1291 | 1243 | -116 | -131 | -13  |
| 208 | 1251 | 1274 | 1230 | 1195 | 1192 | 1251 | -60  | -41  | -122 |
| 209 | 1548 | 1537 | 950  | 1227 | 1244 | 1303 | -51  | -69  | -112 |
| 210 | 1475 | 1568 | 648  | 1379 | 1351 | 1201 | -18  | 60   | -37  |
| 211 | 1121 | 1110 | 1532 | 1218 | 1226 | 1291 | -60  | -71  | -97  |
| 212 | 736  | 749  | 1115 | 1225 | 1213 | 1239 | -7   | 3    | -79  |
| 213 | 669  | 677  | 1044 | 1186 | 1180 | 1230 | -39  | -32  | -39  |
| 214 | 1322 | 1319 | 1521 | 1242 | 1252 | 1402 | -153 | -160 | -152 |
| 215 | 858  | 866  | 810  | 1211 | 1194 | 1242 | -44  | -35  | -4   |
| 216 | 1611 | 1558 | 1553 | 1370 | 1385 | 1324 | -80  | -130 | -90  |
| 217 | 1456 | 1531 | 1500 | 1317 | 1286 | 793  | -45  | 24   | 45   |
| 218 | 1325 | 1339 | 1449 | 1234 | 1238 | 1307 | -154 | -143 | -150 |
| 219 | 855  | 866  | 1242 | 758  | 754  | 1219 | -15  | -5   | -77  |
| 220 | 1474 | 1516 | 1527 | 1297 | 1290 | 1259 | -126 | -88  | -85  |
| 221 | 1621 | 1672 | 1455 | 1402 | 1373 | 1394 | 0    | 50   | -39  |
| 222 | 1387 | 1447 | 1098 | 1323 | 1293 | 1239 | -158 | -99  | -84  |
| 223 | 1616 | 1621 | 725  | 1321 | 1310 | 1246 | 16   | 22   | -17  |
| 224 | 1325 | 1388 | 660  | 1382 | 1350 | 1207 | -198 | -137 | -48  |
| 225 | 1672 | 1599 | 1315 | 1416 | 1424 | 1270 | 53   | -8   | -172 |
| 226 | 1842 | 1838 | 825  | 1345 | 1345 | 1242 | 4    | 1    | -74  |
| 227 | 1559 | 1594 | 1572 | 1313 | 1296 | 1395 | -96  | -62  | -123 |
| 228 | 1520 | 1563 | 1445 | 1327 | 1303 | 1331 | -103 | -60  | -58  |
| 229 | 1755 | 1745 | 1321 | 1363 | 1362 | 1262 | -26  | -34  | -165 |
| 230 | 1949 | 1981 | 816  | 1404 | 1380 | 762  | 250  | 283  | -51  |
| 231 | 1474 | 1411 | 1454 | 1578 | 1584 | 1318 | -18  | -71  | -150 |
| 232 | 1770 | 1813 | 1598 | 1262 | 1249 | 1418 | 45   | 85   | -23  |
| 233 | 1949 | 1981 | 1379 | 1404 | 1380 | 1339 | 332  | 365  | -171 |
| 234 | 1115 | 1110 | 1590 | 1327 | 1338 | 1336 | -91  | -97  | -10  |
| 235 | 1852 | 1711 | 1317 | 1510 | 1544 | 1396 | 96   | -38  | -209 |
| 236 | 2003 | 1840 | 1672 | 1443 | 1471 | 1437 | 66   | -81  | 48   |
| 237 | 990  | 1001 | 1825 | 1348 | 1353 | 1364 | -18  | -13  | -17  |
| 238 | 1513 | 1495 | 1547 | 1284 | 1303 | 1329 | -93  | -115 | -110 |
| 239 | 1910 | 1735 | 1509 | 1532 | 1562 | 1344 | -54  | -212 | -120 |
| 240 | 1731 | 1605 | 1746 | 1671 | 1723 | 1381 | -127 | -249 | -40  |
| 241 | 1476 | 1428 | 1908 | 1464 | 1489 | 1420 | -163 | -212 | 212  |
| 242 | 1838 | 1779 | 1474 | 1350 | 1382 | 1599 | 73   | 12   | -21  |
| 243 | 1523 | 1509 | 1764 | 1278 | 1298 | 1277 | -62  | -80  | 36   |

|     |      |      |      |      |      |      |      |      |      |
|-----|------|------|------|------|------|------|------|------|------|
| 244 | 1069 | 1075 | 1908 | 1339 | 1346 | 1420 | 8    | 10   | 294  |
| 245 | 1954 | 1928 | 1094 | 758  | 755  | 1344 | 367  | 343  | -111 |
| 246 | 1916 | 1726 | 1752 | 780  | 777  | 1542 | 144  | -20  | 0    |
| 247 | 1894 | 1739 | 1953 | 783  | 779  | 1471 | 335  | 211  | 13   |
| 248 | 1760 | 1642 | 978  | 1553 | 1597 | 1366 | -90  | -205 | -28  |
| 249 | 1733 | 1609 | 1488 | 1476 | 1500 | 1315 | -50  | -159 | -125 |
| 250 | 1729 | 1659 | 1806 | 1530 | 1562 | 1558 | -191 | -270 | -151 |
| 251 | 2000 | 1850 | 1621 | 1566 | 1611 | 1718 | 116  | -22  | -234 |
| 252 | 1342 | 1316 | 1407 | 1327 | 1339 | 1495 | -13  | -37  | -232 |
| 253 | 1836 | 1741 | 1773 | 1322 | 1351 | 1392 | 131  | 40   | 4    |
| 254 | 1901 | 1738 | 1503 | 1504 | 1530 | 1310 | 18   | -127 | -90  |
| 255 | 1250 | 1242 | 1054 | 1323 | 1334 | 1357 | -74  | -84  | -6   |
| 256 | 1654 | 1581 | 1912 | 1487 | 1527 | 765  | -191 | -285 | 327  |
| 257 | 1474 | 1463 | 1836 | 1259 | 1277 | 787  | 10   | -2   | 72   |
| 258 | 1636 | 1480 | 1790 | 1600 | 1626 | 790  | -98  | -241 | 247  |
| 259 | 1802 | 1738 | 1655 | 1372 | 1383 | 1596 | 7    | -50  | -194 |
| 260 | 1040 | 1050 | 1700 | 1309 | 1315 | 1505 | -28  | -24  | -88  |
| 261 | 1320 | 1313 | 1639 | 1209 | 1219 | 1563 | 39   | 31   | -287 |
| 262 | 1149 | 1146 | 1860 | 1085 | 1091 | 1611 | 119  | 115  | -15  |
| 263 | 1179 | 1173 | 1303 | 1214 | 1222 | 1351 | -23  | -29  | -51  |
| 264 | 1470 | 1461 | 1761 | 1154 | 1161 | 1353 | 185  | 177  | 57   |
| 265 | 524  | 520  | 1861 | 1075 | 1083 | 1531 | 18   | 15   | -26  |
| 266 | 438  | 454  | 1225 | 1253 | 1262 | 1340 | -27  | -13  | -98  |
| 267 | 1730 | 1735 | 1558 | 1313 | 1322 | 1540 | 153  | 154  | -315 |
| 268 | 1462 | 1459 | 1456 | 1306 | 1314 | 1288 | 69   | 64   | -11  |
| 269 | 1361 | 1370 | 1598 | 1304 | 1312 | 1626 | 84   | 89   | -136 |
| 270 | 690  | 690  | 1798 | 1139 | 1146 | 1396 | 3    | 2    | -6   |
| 271 | 600  | 606  | 1025 | 1146 | 1152 | 1324 | -26  | -21  | -41  |
| 272 | 581  | 582  | 1305 | 1129 | 1135 | 1227 | 26   | 25   | 23   |
| 273 | 1390 | 1391 | 1135 | 906  | 903  | 1093 | 132  | 134  | 108  |
| 274 | 1105 | 1116 | 1165 | 1321 | 1327 | 1227 | -66  | -63  | -36  |
| 275 | 382  | 387  | 1449 | 848  | 846  | 1163 | 44   | 46   | 166  |
| 276 | 175  | 176  | 523  | 821  | 818  | 1082 | -19  | -19  | 17   |
| 277 | 174  | 172  | 444  | 773  | 771  | 1257 | -19  | -20  | -22  |
| 278 | 236  | 234  | 1686 | 1045 | 1048 | 1329 | -21  | -23  | 114  |
| 279 | 244  | 243  | 1434 | 1130 | 1131 | 1324 | 23   | 22   | 42   |
| 280 | 231  | 234  | 1340 | 732  | 729  | 1323 | -63  | -61  | 64   |
| 281 | 282  | 285  | 679  | 743  | 740  | 1148 | -26  | -24  | -6   |
| 282 | 110  | 108  | 593  | 754  | 751  | 1150 | -58  | -59  | -32  |
| 283 | 229  | 227  | 559  | 1072 | 1075 | 1140 | -37  | -39  | 9    |
| 284 | 223  | 222  | 1345 | 1140 | 1142 | 920  | 32   | 32   | 94   |
| 285 | 116  | 115  | 1089 | 1149 | 1152 | 1340 | 7    | 6    | -81  |
| 286 | 368  | 343  | 374  | 1165 | 1172 | 1175 | -119 | -137 | -116 |
| 287 | 154  | 155  | 152  | 1279 | 1266 | 1289 | -7   | -7   | -8   |
| 288 | 236  | 235  | 250  | 1189 | 1186 | 1196 | -179 | -179 | -170 |
| 289 | 221  | 217  | 233  | 1249 | 1248 | 1257 | -99  | -102 | -92  |

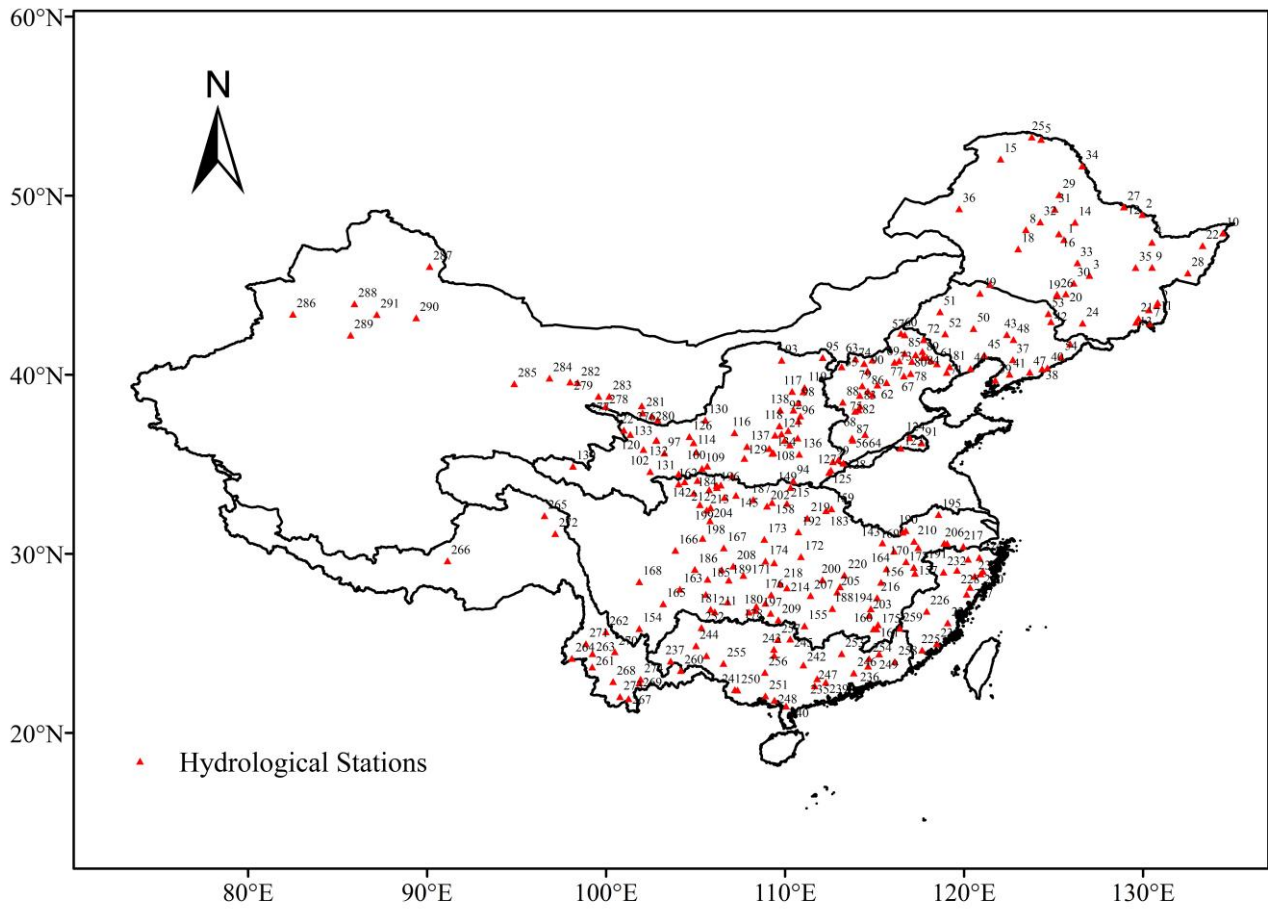

**Figure S1.** The spatial distribution of the 291 study catchments.
